## Main Manuscript for

### Structural basis of Rgg protein binding to their regulatory pheromones and target DNA promoters

**Glenn C. Capodagli<sup>1#</sup>, Kaitlyn M. Tylor<sup>2#</sup>, Jason T. Kaelber<sup>3,4</sup>, Vasileios I. Petrou<sup>1,5\*</sup>, Michael J. Federle<sup>6\*</sup>, and Matthew B. Neiditch<sup>1\*</sup>**

<sup>1</sup>Department of Microbiology, Biochemistry, and Molecular Genetics, New Jersey Medical School, Rutgers Biomedical Health Sciences, Newark, NJ 07103

<sup>2</sup>Department of Microbiology and Immunology, University of Illinois at Chicago, Chicago, IL 60607

<sup>3</sup>Rutgers New Jersey CryoEM/CryoET Core Facility, Rutgers University, Piscataway, NJ 08854

<sup>4</sup>Institute for Quantitative Biomedicine, Rutgers University, Piscataway, NJ 08854

<sup>5</sup>Center for Immunity and Inflammation, New Jersey Medical School, Rutgers Biomedical Health Sciences, Newark, NJ 07103

<sup>6</sup>Department of Medicinal Chemistry and Pharmacognosy; Center for Biomolecular Sciences, University of Illinois at Chicago, Chicago, IL 60607

# These authors contributed equally to this work

\* Co-corresponding authors

Corresponding Authors: Matthew B. Neiditch, Michael J. Federle, Vasileios I. Petrou

Email: [matthew.neiditch@rutgers.edu](mailto:matthew.neiditch@rutgers.edu), [mfederle@uic.edu](mailto:mfederle@uic.edu), [vasileios.petrou@rutgers.edu](mailto:vasileios.petrou@rutgers.edu)

ORCID IDs:

Glenn C. Capodagli

<https://orcid.org/0000-0002-0227-4529>

Kaitlyn M. Tylor

<https://orcid.org/0000-0002-3117-6338>

Jason T. Kaelber

<https://orcid.org/0000-0001-9426-1030>

Vasileios I. Petrou

<https://orcid.org/0000-0002-3194-9863>

Michael J. Federle

<https://orcid.org/0000-0002-4554-543X>

Matthew B. Neiditch

<https://orcid.org/0000-0002-7039-4469>

### **Classification**

Biological Science  
Microbiology

### **Keywords**

peptide pheromones, RRNPP proteins, quorum sensing, Streptococcus, cryo-EM and X-ray crystallography

### **Author Contributions**

G.C.C., K.M.T., J.T.K., V.I.P, M.J.F., and M.B.N. designed research, performed research, contributed new reagents/analytic tools, analyzed data, and wrote the paper.

### **This PDF file includes:**

Main Text  
Figures 1 to 6  
Supplementary text  
Figures S1 to S8  
Tables S1 to S3  
SI References

## Abstract

Rgg family proteins, such as Rgg2 and Rgg3, have emerged as primary quorum-sensing regulated transcription factors in *Streptococcus* species, controlling virulence, antimicrobial resistance, and biofilm formation. Rgg2 and Rgg3 function is regulated by their interaction with oligopeptide quorum-sensing signals called short hydrophobic peptides (SHPs). The molecular basis of Rgg-SHP and Rgg-target DNA promoter specificity was unknown. To close this gap, we determined the cryo-EM structure of *Streptococcus thermophilus* Rgg3 bound to its quorum-sensing signal, SHP3, and the X-ray crystal structure of Rgg3 alone. Comparison of these structures to that of an Rgg in complex with cyclosporin A (CsA), an inhibitor of SHP-induced Rgg activity, reveals the molecular basis of CsA function. Furthermore, to determine how Rgg proteins recognize DNA promoters, we determined X-ray crystal structures of both *S. dysgalactiae* Rgg2 and *S. thermophilus* Rgg3 in complex with their target DNA promoters. The physiological importance of the observed Rgg-DNA interactions was dissected using *in vivo* genetic experiments and *in vitro* biochemical assays. Based on these structure-function studies, we present a revised unifying model of Rgg regulatory interplay. In contrast to existing models, where Rgg2 proteins are transcriptional activators and Rgg3 proteins are transcriptional repressors, we propose that both are capable of transcriptional activation. However, when Rgg proteins with different activation requirements compete for the same DNA promoters, those with more stringent activation requirements function as repressors by blocking promoter access of the SHP-bound conformationally active Rgg proteins. While a similar gene expression regulatory scenario has not been previously described, in all likelihood it is not unique to streptococci.

## Significance Statement

Secreted peptide pheromones regulate critical biological processes in Gram-positive bacteria. In streptococci such as the human pathogen *S. pyogenes*, oligopeptide pheromones, like the short hydrophobic peptides (SHPs), regulate virulence, antimicrobial resistance, and biofilm

formation. SHPs directly regulate the activity of transcription factors called Rgg2 and Rgg3. We present the cryo-EM structure of Rgg3 in complex with SHP3, as well as X-ray crystal structures of Rgg2 bound to target promoter DNA, Rgg3 bound to target promoter DNA, and Rgg3 alone. Based on the cryo-EM, X-ray crystallographic, biochemical, and genetic studies presented here, we provide not only detailed mechanistic insight into the molecular basis of Rgg3-SHP3, Rgg2-DNA, and Rgg3-DNA binding specificity, but also a new model of transcription factor regulatory interplay.

## **Main Text**

### **Introduction**

Gram-positive bacteria use oligopeptides as signals for cell-cell communication, a process known as quorum sensing (1). The oligopeptide signals (also known as pheromones or autoinducers) are synthesized as pro-peptides, usually containing an N-terminal secretion signal. The pro-peptides are proteolytically processed to their mature form and secreted. The pheromones then bind to and regulate the activity of a membrane-bound receptor, or otherwise bind to an oligopeptide permease that transports the pheromone into the cytoplasm. Here, the pheromones bind receptors called RRNPP proteins, named after the family member archetypes Rap, Rgg, NprR, PlcR, and PrgX.

The primary family of quorum-sensing receptors in *Streptococcus* species are the Rgg proteins, which, for example, regulate virulence, antimicrobial resistance, and competence-related genes in the human pathogen *Streptococcus pyogenes* (Group A *Streptococcus*)(2-7). Rgg proteins are DNA-binding transcription factors, whose activity is regulated by oligopeptide pheromones such as the short hydrophobic peptides (SHPs) (1, 8-10).

It was previously reported that nearly all streptococci encode an *rgg* gene, with some species containing multiple paralogs (11). Two families of Rgg proteins, Rgg2 and Rgg3, have been described based on their sequence similarity (9). Following genetic and biochemical studies

in *S. pyogenes*, it was proposed that Rgg2 proteins are transcriptional activators while Rgg3 proteins are transcriptional repressors (9). The SHPs that target Rgg2 and Rgg3 proteins are called SHP2 and SHP3, respectively, although there can be crosstalk, e.g., *S. pyogenes* SHP2 and SHP3 have similar amino acid sequences and bind to both Rgg2<sub>sp</sub> and Rgg3<sub>sp</sub> (5). Furthermore, the mature SHP2 and SHP3 peptides have been categorized as belonging to one of three groups (10). Group I and II SHPs contain an N-terminal aspartate or glutamate, respectively, and they are typically eight or nine amino acids long. Group I and II *shp* genes are located in close proximity to the genes encoding their cognate Rgg target proteins from which they are divergently transcribed. Group III SHPs contain an N-terminal aspartate or glutamate, but they are encoded by genes overlapping the ends of the *rgg* genes from which they are convergently transcribed. The acidic residues at the N-terminus of the SHPs are required for their activity, but the reason for this requirement was unknown (5, 8, 12). The structural basis of SHP binding to Rgg2 and Rgg3 proteins, as well as the structural basis of Rgg binding to DNA, were also unknown.

In previous studies we determined the X-ray crystal structures of *Streptococcus dysgalactiae* Rgg2 (Rgg2<sub>sd</sub>) alone and in complex with cyclosporin A (CsA), which we proposed is a competitive inhibitor of SHP2 and SHP3 binding (13). These structural studies along with complementary *in vitro* biochemical and *in vivo* genetic analyses showed that Rgg2 and Rgg3 proteins contain an N-terminal XRE-family DNA-binding domain and a C-terminal tetratricopeptide-like SHP2 and SHP3-binding domain (called the repeat domain). These studies provided insight into the Rgg2 structure only, and not Rgg3. Most importantly, they did not reveal how Rgg2 or Rgg3 proteins function to specifically recognize their cognate SHPs or target DNA promoters. In addition, because we did not understand how SHPs bind to Rgg proteins, it was not clear how CsA functions to inhibit their activity.

To address these gaps we determined the cryo-EM structure of *Streptococcus thermophilus* Rgg3 (Rgg3<sub>st</sub>) in complex with SHP3, the X-ray crystal structures of Rgg3<sub>st</sub> alone, the X-ray crystal

structure of Rgg2<sub>Sd</sub> in complex with its target Rgg-box DNA, and the X-ray crystal structure of Rgg3<sub>St</sub> in complex with its target Rgg-box. Based on the cryo-EM, X-ray crystallographic, biochemical, and genetic studies presented here, we provide not only detailed mechanistic insight into Rgg-SHP, Rgg2-DNA, and Rgg3-DNA interactions, but also a definitive explanation for the inhibitory action of CsA and a new model of Rgg2 and Rgg3 regulatory interplay.

More specifically, in contrast to previous models describing Rgg2 as a transcriptional activator and Rgg3 as transcriptional repressor, we propose that Rgg2 and Rgg3 proteins are both transcriptional activators; however, in species encoding multiple Rgg proteins that are in competition for the same Rgg-box, an Rgg protein whose activation requires a significantly greater concentration of SHP can function as a repressor by sterically blocking access to the shared DNA binding site. To our knowledge this is a new model of transcriptional repression, where a DNA binding-competent yet *inactive* transcriptional activator functions as a repressor by inhibiting the access of another activator to a shared promoter.

## Results

### Cryo-EM Structure of the Rgg3<sub>St</sub>-SHP3 Complex and X-ray Crystal Structure of Rgg3<sub>St</sub>

The molecular weight of Rgg proteins (66 kDa dimer) approaches the lower limit of the high-resolution structures that have been solved using cryo-EM (14, 15). Despite this fact, when crystallization of SHP-bound Rgg proteins proved intractable we evaluated the use of single-particle cryo-EM for determination of the complex structure. We observed that Rgg3<sub>St</sub> behavior was robust under cryogenic conditions, resulting in excellent particle distribution (Fig. S1A). Then, using the workflow described in Fig. S1B, we successfully determined the structure of Rgg3<sub>St</sub>-SHP3 to 3 Å resolution (Figs. 1 A-B, and S1; and Table S1). In addition to the cryo-EM structure of Rgg3<sub>St</sub>-SHP3, we also determined the X-ray crystal structure of Rgg3<sub>St</sub> alone to 2.20 Å resolution (Fig. 1 C-D and Table S2). In both structures, the electron density corresponding to the DNA

binding domain is uninterpretable, suggesting that the DNA binding domain is mobile, adopting numerous conformations relative to the repeat domain. In contrast, the electron density corresponding to the Rgg3 repeat domain and bound SHP3 are readily interpretable (Fig. S3 A-B). As detailed below, these structures reveal the contacts responsible for Rgg-SHP interaction specificity, the SHP-triggered Rgg repeat domain conformational change, the mechanistic basis underlying the phenotypes of numerous *rgg* mutations (12), and the mechanism of action of CsA, a previously identified inhibitor of SHP-triggered Rgg function (13, 16).

*S. thermophilus* SHP3 (amino acid sequence DIIIVGG) is an archetype SHP peptide, containing an N-terminal acidic residue followed by seven hydrophobic amino acids (Fig. 1 A-B, and E). The Rgg3<sub>St</sub>-SHP3 structure shows that SHP3 binds to the concave surface of the right-handed superhelical repeat domain (Fig. 1 A and E). Structural comparison of Rgg3<sub>St</sub>-SHP3 and Rgg3<sub>St</sub> alone shows that upon binding SHP3, the repeat domain compresses along its superhelical axis, transitioning from an open to closed conformation, largely burying SHP3 in the repeat domain core and generating new contacts between previously distant repeat domain helices, e.g.,  $\alpha 6$  and  $\alpha 16$  (Fig. 1 A-D).

The Rgg3<sub>St</sub>-SHP3 interactions are extensive (Fig. 1E). The SHP3 N-terminal aspartate forms a salt-bridge with the side chain of Rgg3<sub>St</sub> Arg159, which is highly conserved in Rgg2 and Rgg3 proteins associated with group I SHPs (i.e., SHPs containing an N-terminal aspartate)(Figs. 1E and S4)(10). While the side chains of the remaining SHP3 residues mediate hydrophobic interactions, numerous SHP3 main chain nitrogen and carbonyl atoms mediate H-bonds with Rgg3<sub>St</sub> side chains. Furthermore, the SHP3 carboxyl-terminus forms a salt bridge with Rgg3<sub>St</sub> residue R84, which is highly conserved in Rgg2 and Rgg3 proteins associated with both group I and II SHPs (Figs. 1E and S4)(10).

Consistent with the observed Rgg3<sub>St</sub>-SHP3 interactions, we previously found that alanine substitutions in Rgg2<sub>Sd</sub> residues R81, R150, R153, and N190 equivalent to Rgg3<sub>St</sub> residues, R84,

R156, R159, and N196 caused loss of SHP-triggered function in *S. pyogenes* (13). Together, these data show that SHP3 is anchored to Rgg3<sub>St</sub> via salt bridges at the SHP3 N- and C-terminus; and that interactions throughout SHP3 bind it to Rgg3<sub>St</sub> via hydrophobic contacts mediated by SHP3 side chain atoms and H-bonds mediated by SHP3 main chain atoms. These extensive interactions explain how the relatively short SHPs bind with high affinity and specificity to their cognate Rgg proteins (e.g., *S. pyogenes* Rgg3-SHP3  $K_d = 1.88 \mu\text{M}$ ) (8).

### X-ray Crystal Structure of the Rgg2<sub>Sd</sub>-Rgg Box Complex

To determine how Rgg proteins recognize target DNA promoters, we first determined the X-ray crystal structure of Rgg2<sub>Sd</sub> in complex with Rgg-box DNA (Fig. 2). The 2.8 Å resolution structure was determined using phases obtained by molecular replacement (see Experimental Procedures and Table S2). The crystallographic asymmetric unit contains an Rgg2<sub>Sd</sub> domain-swapped dimer and one molecule of double-stranded DNA (dsDNA). We refer to the Rgg2<sub>Sd</sub> protomers as Rgg2<sup>A</sup><sub>Sd</sub> and Rgg2<sup>B</sup><sub>Sd</sub> (Fig. 2 A and B); and, as necessary, we indicate whether nucleotides belong to the top or bottom strands of the Rgg box by the absence or presence of the prime symbol, e.g., C<sup>9</sup> and G<sup>19'</sup>, respectively (Fig. 2 E).

Structural alignment of the Rgg2<sub>Sd</sub> protomers from the Rgg2<sub>Sd</sub>-Rgg box structure shows that the proteins are in similar conformations (rmsd for modeled  $C_\alpha = 0.98 \text{ \AA}$ ) and related by a two-fold symmetry axis; however, it is important to note that the Rgg2<sub>Sd</sub>-Rgg box structure is intrinsically asymmetric due to the fact that the promoter DNA is non-palindromic (Fig. 2E). Comparison of the Rgg2<sub>Sd</sub>-Rgg box and Rgg2<sub>Sd</sub> (PDB ID 4YV6) structures shows that Rgg2<sub>Sd</sub> is dimeric in the presence or absence of DNA, and that Rgg2<sub>Sd</sub> adopts nearly identical conformations in both structures (rmsd for modeled  $C_\alpha = 0.50 - 0.60 \text{ \AA}$  for measured pair-wise comparisons of Rgg2<sub>Sd</sub> dimers). Consistent with their structural similarity, the intermolecular disulphide bond we



previously identified in the structure of Rgg2<sub>sd</sub> alone is also present in the crystal structure of Rgg2<sub>sd</sub>-Rgg box as well as in solution (Figs. 2A and S5)(13).

The DNA binding domains of both Rgg2<sup>A</sup><sub>sd</sub> and Rgg2<sup>B</sup><sub>sd</sub> interact with the Rgg box, which is B-form and bent 47.8° (Fig. 2A)(17). The Rgg2<sup>A</sup><sub>sd</sub>-DNA and Rgg2<sup>B</sup><sub>sd</sub>-DNA interfaces bury a similar amount of surface area 1,210.0 Å<sup>2</sup> and 1,243.7 Å<sup>2</sup>, respectively. While non-specific interactions with the Rgg-box sugar-phosphate backbone are mediated by amino acids distributed throughout much of the DNA binding domains including helices  $\alpha$ 1- $\alpha$ 4 and their intervening loops (Fig. 2B-E), only residues in the DNA binding domain helix  $\alpha$ 3 mediate base-specific contacts (Fig. 2B-E). Nucleotide base-specific hydrogen bonds are mediated by the side chains of Rgg2<sup>A</sup><sub>sd</sub> residues K30 with G<sup>19'</sup> and G<sup>20'</sup>; S31 with C<sup>9</sup>; and R35 with G<sup>18'</sup>; as well as Rgg2<sup>B</sup><sub>sd</sub> residues S31 with C<sup>19</sup> and A<sup>20</sup>; Q32 with A18; and R35 with G10.

### **X-ray Crystal Structures of Rgg3<sub>st</sub>-Rgg Box and Rgg3<sub>st</sub>**

In the existing model of Rgg function, Rgg2 and Rgg3 proteins are transcriptional activators and repressors, respectively. We proposed that structural comparison of Rgg2 and Rgg3 proteins in complex with DNA would reveal the mechanistic basis of this functional difference. Thus, with the structure of Rgg2<sub>sd</sub>-Rgg box in hand, we determined the X-ray crystal structure of *S. thermophilus* Rgg3 (Rgg3<sub>st</sub>) in complex with Rgg-box DNA to 3.20 Å resolution (Fig. S6 and Table S2).

Overall, the structure of Rgg3<sub>st</sub>-Rgg box (Fig. S6) is very similar to the structure of Rgg2<sub>sd</sub>-Rgg box (Fig. 2) with an rmsd for modeled C $\alpha$  = 1.11 Å. Consistent with the striking amino acid conservation of their  $\alpha$ 3 helices (Fig. S4), Rgg3<sub>st</sub> employs many of the same residues as Rgg2<sub>sd</sub> to bind DNA specifically and non-specifically (Figs. S4 and S6). However, consistent with the lower resolution of the Rgg3<sub>st</sub>-Rgg box structure, the quality of the electron density corresponding to its

Rgg box DNA and interacting Rgg3<sub>St</sub> side chains was comparatively lower than that of the Rgg2<sub>Sd</sub>-Rgg box structure (Fig. S7), thus, side chain rotameric configurations were, in some cases, less definitive for Rgg3<sub>St</sub>-Rgg box than for Rgg2<sub>Sd</sub>-Rgg box. For example, Rgg3<sub>St</sub> residue R10 likely forms bidentate H-bonds to T7' (equivalent to Rgg2<sub>Sd</sub>-box DNA T8'); however, as modeled, to form these bonds the Rgg3<sub>St</sub> R10 side chain would be required to shift approximately 0.6 Å (Figs. 2E, S6, and S7). In sum, Rgg2<sub>Sd</sub> and Rgg3<sub>St</sub> share a striking overall structural similarity that is consistent with the revised model of Rgg2/3 function presented below.

### **Cyclosporin A and SHP Bind to Overlapping Sites on Rgg Proteins, and Cyclosporin A Sterically Blocks the SHP-Induced Rgg Conformational Change**

We previously demonstrated that CsA is an inhibitor of SHP binding to Rgg proteins and that Rgg binding to DNA is unaffected by the presence of CsA (13). We also determined the X-ray crystal structure of CsA in complex with Rgg2<sub>Sd</sub>, which showed that CsA can bind in two different conformations to the repeat domain core (Figs. 3A and S8), and we found in genetic studies that many of the Rgg2<sub>Sd</sub> residues that interact with CsA are also required for SHP2 to activate Rgg2<sub>Sd</sub>. Thus, we proposed that the CsA- and SHP-binding sites might overlap. Based on a structural comparison of Rgg3<sub>St</sub>-SHP3 (Fig. 3B) and Rgg2<sub>Sd</sub>-CsA (Figs. 3C and S8), we conclude that CsA and SHP compete to bind overlapping sites on the concave surface of the Rgg repeat domain core.

Interestingly, Rgg2<sub>Sd</sub>-CsA, Rgg2<sub>Sd</sub>-Rgg box, and Rgg3<sub>St</sub>-Rgg box are in essentially identical conformations, i.e., in each case Rgg2<sub>Sd</sub> or Rgg3<sub>St</sub> is in the repeat domain open, i.e., SHP-accessible (if not for the presence of CsA), and DNA binding proficient conformation. Based on the alignment of Rgg3<sub>St</sub>-SHP3 and Rgg2<sub>Sd</sub> bound to CsA (Figs. 3C and S8), it is now clear how CsA prevents Rgg proteins from adopting the closed (transcriptionally active) conformation. CsA not only competes with SHP for access to their overlapping binding site in the repeat domain core,

CsA also acts as a wedge, locking the Rgg repeat domain in the open (transcriptionally inactive) conformation.

## **Rgg2 and Rgg3 Proteins are Transcriptional Activators**

In the course of Rgg2 and Rgg3 functional studies, we routinely employ a luciferase reporter transcriptional bioassay (18). In this bioassay, the luciferase genes are under the control of the Rgg2- and Rgg3-regulated promoter *Pshp3*. Using these bioassays, we previously demonstrated that Rgg2<sub>sp</sub> is an activator, triggered by SHPs. We also showed that Rgg3<sub>sp</sub> is a transcriptional repressor, de-repressed by SHP peptide. However, we show here that at concentrations of SHP3 higher than previously examined Rgg3<sub>sp</sub> is in fact a comparatively weak activator at *Pshp3* (Fig. 4 A-B).

When we carried out similar analysis using Rgg3<sub>st</sub>, we discovered that it is a remarkably strong activator at *Pshp3* even at low concentrations of SHP3 (Fig. 4 B). Motivated by the finding that Rgg3<sub>sp</sub> and Rgg3<sub>st</sub> are transcriptional activators (when, again, in previous models they were suspected to be repressors), we examined additional Rgg3 proteins, namely *S. pneumoniae* Rgg3 (Rgg3<sub>spn</sub>) and *S. porcinus* Rgg3 (Rgg3<sub>spo</sub>). Both proteins activated transcription at *Pshp3* (Fig. 4 B). Thus, all Rgg2 and Rgg3 proteins examined to date are SHP2/3 responsive transcriptional activators. How Rgg3<sub>sp</sub> also functions as a transcriptional repressor in the context of Rgg2<sub>sp</sub> is discussed below.

In genetic selections to generate Rgg3<sub>sp</sub> mutations that enhance its transcriptional activity, we identified Rgg3<sub>sp</sub>-M173I (Fig. 4C). We previously found that the analogous substitution in Rgg2<sub>sp</sub> (M167I) caused SHP-independent Rgg2<sub>sp</sub> activation (12). Given the similar effect of these mutations in Rgg2<sub>sp</sub> and Rgg3<sub>sp</sub>, additional residues we previously found to confer constitutive Rgg2<sub>sp</sub> activity were constructed at corresponding positions in Rgg3<sub>sp</sub>. Indeed, these mutations significantly increased Rgg3<sub>sp</sub> transcriptional activity *in vivo* (Fig. 4C). None of the wild-type

residues substituted in the gain-of-function mutants interact directly with SHP3, and we demonstrated previously for Rgg2<sub>sp</sub> that they do not increase SHP- or DNA-binding affinity (12). Thus, the mutants appear to function allosterically, likely stabilizing Rgg2 and Rgg3 proteins in an activated (closed) conformation. Together, the above results are consistent with a model where Rgg2 and Rgg3 proteins are activators that function in a mechanistically similar if not identical manner.

### ***In Vitro* and *In Vivo* Functional Analysis of Conserved Rgg2-Rgg box and Rgg3-Rgg box interactions**

With an Rgg3<sub>st</sub> luciferase reporter transcriptional bioassay in hand (Fig. 4), we sought to confirm the mechanistic and biological importance of the protein-DNA contacts observed in both the Rgg2<sub>sd</sub>-Rgg box and Rgg3<sub>st</sub>-Rgg box crystal structures. In addition to *in vivo* genetic Rgg3<sub>st</sub> *Pshp3* luciferase reporter transcriptional bioassays (Fig. 5A), we carried out *in vitro* electrophoretic mobility shift assays (EMSAs) (Fig. 5B). More specifically, for these *in vivo* and *in vitro* loss-of-function studies we mutated to alanine selected residues in Rgg3<sub>st</sub> that are conserved in Rgg2 and Rgg3 proteins and observed to contact DNA in both the Rgg2<sub>sd</sub>-Rgg box and Rgg3<sub>st</sub>-Rgg box crystal structures (Figs. 2E and S6E).

In sum, in comparison to wild-type Rgg3<sub>st</sub>, the Rgg3<sub>st</sub>-R13A and Rgg3<sub>st</sub>-R35A mutants displayed a complete loss of function (Fig. 5A), i.e., they showed no response whatsoever to SHP3. Rgg3<sub>st</sub>-S31A and Rgg3<sub>st</sub>-R10A, however, displayed intermediate phenotypes, i.e., they had SHP3-dependent activity but were far less active than wild-type Rgg3<sub>st</sub>. Consistent with these results, Rgg3<sub>st</sub>-R13A and Rgg3<sub>st</sub>-R35A did not bind to the labeled DNA probe in the EMSA, while Rgg3<sub>st</sub>-R10A and Rgg3<sub>st</sub>-S31A displayed severe DNA-binding defects (Fig. 5B). Interestingly, the Rgg3<sub>st</sub>-S31A defect was partially compensated for by the presence of SHP3 *in vitro*, which may also explain why its phenotype was less severe than that of Rgg3<sub>st</sub>-R10A *in vivo* (Fig. 5 A-B).

## Discussion

The archetype RRNPP family member Rgg proteins have emerged as one of the most important regulatory transcription factors in streptococci, controlling virulence, antimicrobial resistance, and biofilm formation (2-5). We propose a revised, unifying model of Rgg2/Rgg3 function based on a combination of biochemical, genetic, X-ray crystallographic, and cryo-EM studies (Fig. 6). While there may be Rgg proteins that prove to be exceptions to this model, we propose that both Rgg2 and Rgg3 proteins are in fact transcriptional activators, and Rgg3 proteins are not inherently transcriptional repressors as previously described. In bacteria such as Group A *Streptococcus* that have two or more Rgg proteins in competition for binding to identical promoter elements, the Rgg proteins can also function as repressors sterically blocking access to Rgg box DNA if at least one of these receptors has relatively higher activation requirements. For example, if their *in vivo* activation threshold requires different SHP concentrations, an inactive Rgg could inhibit the DNA binding of other activated Rggs. To our knowledge, a similar gene expression regulatory scenario has not been previously described but in all likelihood is not unique to streptococci.

Furthermore, we have identified one Rgg, Rgg3<sub>sp</sub>, whose DNA binding affinity is moderately decreased upon binding SHP2 or SHP3 (19). While Rgg3<sub>sp</sub> is a SHP2/3-dependent transcriptional activator, consistent with the fact that it functions primarily as a transcriptional repressor competing with Rgg2<sub>sp</sub> for binding SHP2/3 and Rgg box DNA, Rgg3<sub>sp</sub> transcriptional activation requires higher concentrations of SHP2/3 than does Rgg2<sub>sp</sub> (Fig. 4). We propose that in the presence of what appears to be a largely redundant Rgg, Rgg2<sub>sp</sub>, there was little pressure to maintain Rgg3<sub>sp</sub> SHP-driven activator function. Thus, at physiological levels of SHP2/3, Rgg3<sub>sp</sub> serves as a repressor, tuning the cellular threshold for SHP2/3 response.

What is the molecular basis of SHP-Rgg binding specificity? Based on the Rgg3<sub>St</sub>-SHP3 cryo-EM structure, the conserved Group I SHP N-terminus Asp, the conservation of the Rgg position equivalent to Rgg3<sub>St</sub> amino acid 159 in Rgg proteins associated with Group I SHPs as Arg, and the fact that all SHPs likely have a C-terminal carboxyl group, we propose the following model of Group I SHP molecular recognition. Group I SHPs recognize their cognate Rgg proteins by scanning their surface for a largely hydrophobic complementary shape. Following this initial recognition event whose specificity is determined primarily by the SHP side chains, the SHP-Rgg interaction is anchored by H-bonds between the SHP main chain and Rgg side chains as well as critical hotspot interactions. The hotspot interactions are salt bridges at the SHP N- and C-termini. The N-terminal SHP salt bridge is mediated by its conserved Asp1 side chain and a conserved Arg side chain in its target Rgg (at the position equivalent to Rgg3<sub>St</sub> R159)(Fig. 1E). We previously found that a mutation here eliminated SHP-triggered activity in Rgg2<sub>Sp</sub> (12, 13). The C-terminal SHP salt bridge is mediated by the C-terminal carboxy group and a conserved Arg side chain in its cognate Rgg (at the position equivalent to Rgg3<sub>St</sub> 84). We similarly found that a mutation here eliminated SHP-triggered Rgg2<sub>Sp</sub> activity (13). We suspect that SHPs containing Glu at their N-terminus, e.g., Group II SHPs, recognize their cognate Rgg proteins using a similar mechanism; however, their binding mode in the Rgg repeat domain core is going to be somewhat different because there is no basic residue in their associated Rgg proteins at the position equivalent to Rgg3<sub>St</sub> R159.

SHP3 binding to Rgg3<sub>St</sub> induced a large conformational change, compressing the repeat domain along its helical axis and closing the otherwise open repeat domain cleft. How does this SHP-triggered conformational change regulate Rgg transcriptional activation? Our X-ray crystallographic and cryo-EM structures of Rgg proteins point to the fact that the repeat domain and DNA binding domain are connected by a flexible linker and that the repeat domain and DNA binding domain move relative to one another. While the structure of an Rgg in complex with DNA

and SHP will be required to answer this question, we propose that in response to SHP binding, the closed repeat domain dimer rotates relative to the DNA binding domain, which undergoes little conformational change in part due to the fact that the DNA binding domains are linked by intermolecular disulphide bonds. The SHP-bound, rotated repeat domain exposes a surface to RNA polymerase, activating transcription.

As a result of these structure-function studies, we are now well positioned to design pharmacological inhibitors of Rgg function. In addition to designing new inhibitors based on SHP mimetics, our results make clear how the cyclic undecapeptide CsA functions to inhibit Rgg proteins. Based on our studies, the stage is set for the synthesis of non-immunosuppressive CsA derivatives that leverage critical interactions observed in the Rgg3<sub>St</sub>-SHP and Rgg2<sub>Sd</sub>-CsA structures.

## Materials and Methods

The Rgg3<sub>St</sub>-SHP3 structure was determined using single-particle cryo-electron microscopy (cryo-EM). The structures of Rgg3 alone, Rgg2<sub>Sd</sub>-Rgg box, and Rgg3<sub>St</sub>-Rgg box were determined using X-ray crystallography.

Details of the methods are presented in *SI Appendix, SI Materials and Methods*.

## Acknowledgments

We thank Emre Firlar for assistance collecting cryo-EM data, Ned Wingreen for helpful discussions, and Atul Khataokar for critical review of the manuscript. X-ray diffraction data were collected at the Stanford Synchrotron Radiation Light Source. Use of the Stanford Synchrotron Radiation Lightsource, SLAC National Accelerator Laboratory, is supported by the U.S. Department of Energy, Office of Science, Office of Basic Energy Sciences under Contract No. DE-AC02-76SF00515. The SSRL Structural Molecular Biology Program is supported by the DOE

Office of Biological and Environmental Research, and by the National Institutes of Health, National Institute of General Medical Sciences (P41GM103393). The contents of this publication are solely the responsibility of the authors and do not necessarily represent the official views of NIGMS or NIH. Support for this work was provided by National Institutes of Health Grants R01 AI125452 (M.B.N. and M.J.F.); by National Institutes of Health Grants R01 AI091779 (M.J.F.); by the Burroughs Wellcome Fund Investigators of Pathogenesis of Infectious Diseases (M.J.F.); and by the Chicago Biomedical Consortium with support from the Searle Funds at the Chicago Community Trust (M.J.F.).

### **Data Deposition**

Atomic coordinates and structure factors for Rgg3<sub>St</sub>-Rgg box, Rgg2<sub>Sd</sub>-Rgg box, and Rgg3 alone have been deposited in the Protein Data Bank under accession codes 61WF, 61WA, 61WE, respectively. Consistent with journal requirements, the atomic coordinates and cryo-EM map for Rgg3<sub>St</sub>-SHP3 will be deposited in the Protein Data Bank and in the Electron Microscopy Data Bank, respectively.

### **Conflict of Interest Statement**

The authors declare no conflicts of interest.

### **References**

1. M. B. Neiditch, G. C. Capodagli, G. Prehna, M. J. Federle, Genetic and Structural Analyses of RRNPP Intercellular Peptide Signaling of Gram-Positive Bacteria. *Annu Rev Genet* 10.1146/annurev-genet-120116-023507 (2017).
2. J. C. Jimenez, M. J. Federle, Quorum sensing in group A Streptococcus. *Front Cell Infect Microbiol* **4**, 127 (2014).



3. A. A. Zutkis, S. Anbalagan, M. S. Chaussee, A. V. Dmitriev, Inactivation of the Rgg2 transcriptional regulator ablates the virulence of *Streptococcus pyogenes*. *PLoS One* **9**, e114784 (2014).
4. A. Gogos, J. C. Jimenez, J. C. Chang, R. V. Wilkening, M. J. Federle, A Quorum Sensing-Regulated Protein Binds Cell Wall Components and Enhances Lysozyme Resistance in *Streptococcus pyogenes*. *J Bacteriol* **200** (2018).
5. J. C. Chang, J. C. Jimenez, M. J. Federle, Induction of a quorum sensing pathway by environmental signals enhances group A streptococcal resistance to lysozyme. *Mol Microbiol* **97**, 1097-1113 (2015).
6. H. Do *et al.*, Leaderless secreted peptide signaling molecule alters global gene expression and increases virulence of a human bacterial pathogen. *Proc Natl Acad Sci U S A* **114**, E8498-E8507 (2017).
7. L. Mashburn-Warren, D. A. Morrison, M. J. Federle, The cryptic competence pathway in *Streptococcus pyogenes* is controlled by a peptide pheromone. *J Bacteriol* **194**, 4589-4600 (2012).
8. C. Aggarwal, J. C. Jimenez, D. Nanavati, M. J. Federle, Multiple length peptide-pheromone variants produced by *Streptococcus pyogenes* directly bind Rgg proteins to confer transcriptional regulation. *J Biol Chem* **289**, 22427-22436 (2014).
9. J. C. Chang, B. LaSarre, J. C. Jimenez, C. Aggarwal, M. J. Federle, Two group A streptococcal peptide pheromones act through opposing Rgg regulators to control biofilm development. *PLoS Pathog* **7**, e1002190 (2011).
10. B. Fleuchot *et al.*, Rgg proteins associated with internalized small hydrophobic peptides: a new quorum-sensing mechanism in streptococci. *Mol Microbiol* **80**, 1102-1119 (2011).
11. B. Fleuchot *et al.*, Rgg-associated SHP signaling peptides mediate cross-talk in *Streptococci*. *PLoS One* **8**, e66042 (2013).
12. R. V. Wilkening *et al.*, Activating mutations in quorum-sensing regulator Rgg2 and its conformational flexibility in the absence of an intermolecular disulfide bond. *J Biol Chem* **292**, 20544-20557 (2017).
13. V. Parashar, C. Aggarwal, M. J. Federle, M. B. Neiditch, Rgg protein structure-function and inhibition by cyclic peptide compounds. *Proc Natl Acad Sci U S A* **112**, 5177-5182 (2015).
14. M. A. Herzik, Jr., M. Wu, G. C. Lander, High-resolution structure determination of sub-100 kDa complexes using conventional cryo-EM. *Nat Commun* **10**, 1032 (2019).
15. M. Khoshouei, M. Radjainia, W. Baumeister, R. Danev, Cryo-EM structure of haemoglobin at 3.2 Å determined with the Volta phase plate. *Nat Commun* **8**, 16099 (2017).
16. C. Aggarwal *et al.*, Identification of Quorum-Sensing Inhibitors Disrupting Signaling between Rgg and Short Hydrophobic Peptides in *Streptococci*. *MBio* **6** (2015).

17. C. Blanchet, M. Pasi, K. Zakrzewska, R. Lavery, CURVES+ web server for analyzing and visualizing the helical, backbone and groove parameters of nucleic acid structures. *Nucleic Acids Res* **39**, W68-73 (2011).
18. R. V. Wilkening, J. C. Chang, M. J. Federle, PepO, a CovRS-controlled endopeptidase, disrupts *Streptococcus pyogenes* quorum sensing. *Mol Microbiol* **99**, 71-87 (2016).
19. B. Lasarre, C. Aggarwal, M. J. Federle, Antagonistic Rgg regulators mediate quorum sensing via competitive DNA binding in *Streptococcus pyogenes*. *MBio* **3** (2013).
20. R. A. Laskowski, M. B. Swindells, LigPlot+: multiple ligand-protein interaction diagrams for drug discovery. *J Chem Inf Model* **51**, 2778-2786 (2011).
21. N. M. Luscombe, R. A. Laskowski, J. M. Thornton, NUCPLOT: a program to generate schematic diagrams of protein-nucleic acid interactions. *Nucleic Acids Res* **25**, 4940-4945 (1997).

Figures

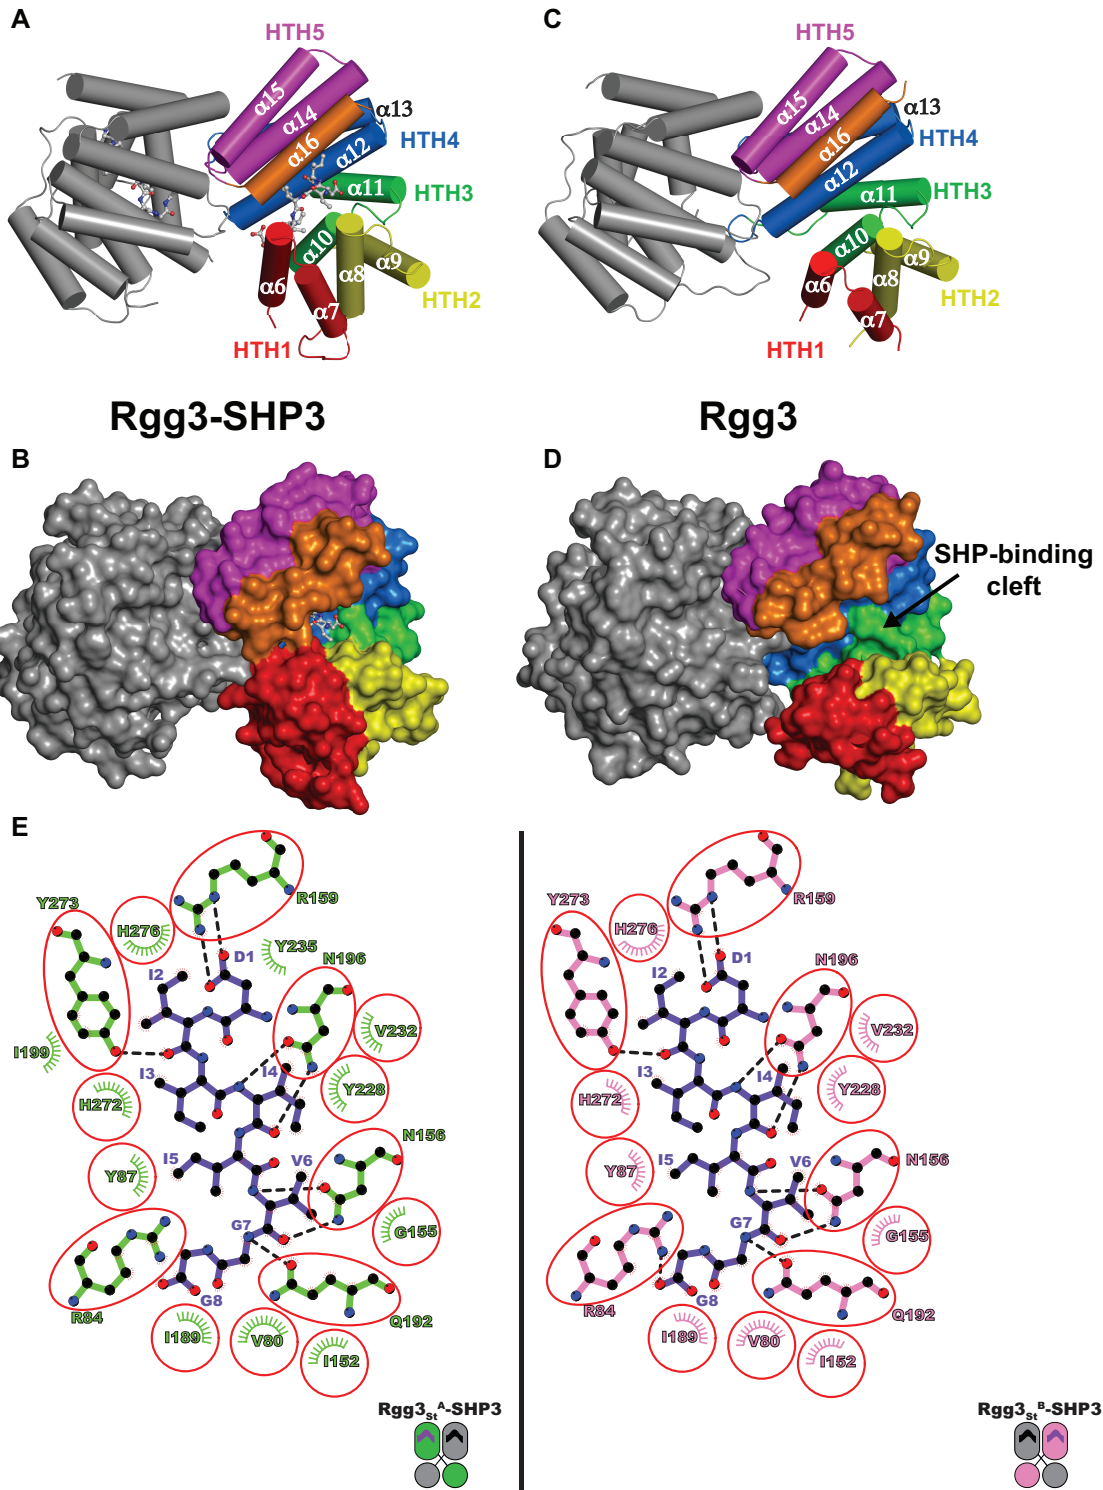

**Fig 1.** Cryo-EM structure of Rgg3<sub>St</sub>-SHP3 and X-ray crystal structure of Rgg3<sub>St</sub>. (A) The cryo-EM structure of Rgg3<sub>St</sub> (rainbow-colored cylinders depict the repeat domain  $\alpha$ -helices of one protomer while the other protomer is colored grey) complexed with SHP3 (ball and stick models). (B) The cryo-EM structure of Rgg3<sub>St</sub> (rainbow surface) bound to SHP3 (ball and stick model). (C) The X-ray crystal structure of Rgg3<sub>St</sub> alone. (D) The X-ray crystal structure of Rgg3<sub>St</sub> alone (rainbow surface). Pheromone binding triggers Rgg3<sub>St</sub> SHP-binding cleft closure. (E) Schematic representation of SHP3 interactions with Rgg3<sup>A</sup><sub>St</sub> (colored green, left) and Rgg3<sup>B</sup><sub>St</sub> (colored magenta, right). SHP3 is depicted as purple bonds, hydrogen bonds are depicted as black dashed lines, hydrophobic contacts mediated by Rgg3<sup>A</sup><sub>St</sub> and SHP3 are shown as green semicircles with radiating lines, while hydrophobic contacts mediated by Rgg3<sup>B</sup><sub>St</sub> and SHP3 are shown as pink semicircles with radiating lines. Red circles indicate SHP3-binding residues in common to Rgg3<sup>A</sup><sub>St</sub> and Rgg3<sup>B</sup><sub>St</sub>. The schematic was produced with LigPlot+ (20). HTH, helix-turn-helix.

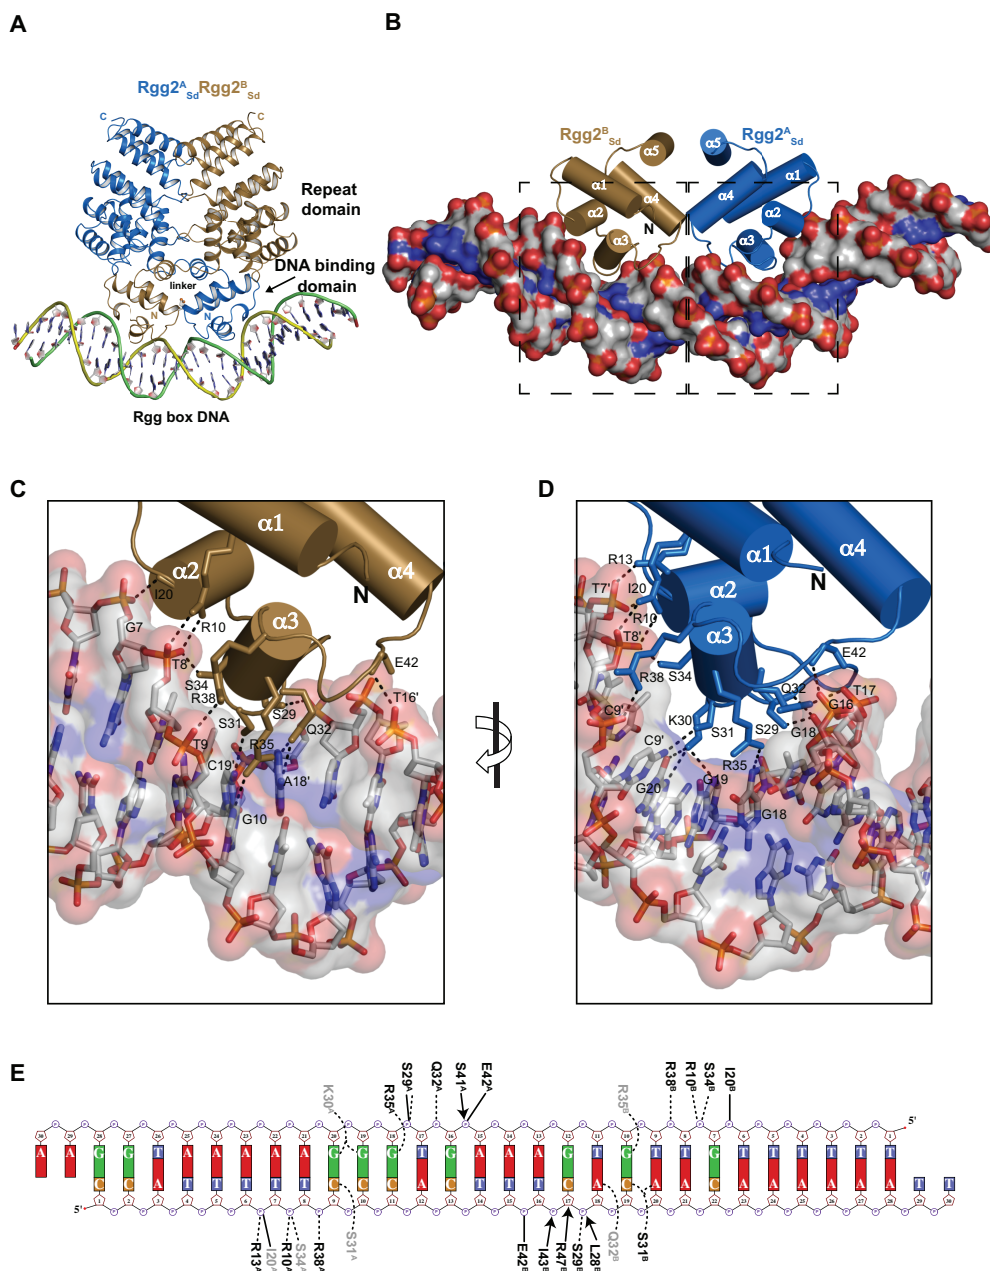

**Fig 2.** Crystal structure of Rgg2<sub>Sd</sub> bound to Rgg2-box DNA. (A) Rgg2<sub>Sd</sub> dimer bound to Rgg2-box DNA. The intermolecular disulfide bond connecting the DNA binding domains is depicted as balls and sticks. (B) Isolated view of the Rgg2<sub>Sd</sub> DNA binding domains (cylindrical helices) in complex with Rgg-box DNA (surface rendering colored by element). (C and D) Expanded view of the areas enclosed by the dashed black rectangles on the left or right in panel B, respectively. The structures were rotated slightly to provide a clear view of the Rgg2<sub>Sd</sub>-Rgg box interactions. Rgg-box is

depicted as a semi-transparent surface and sticks. Rgg2<sub>Sd</sub> side chains or main chains that interact with Rgg-box are labeled and shown as sticks. Hydrogen bonds are depicted as dashed lines. (E) Rgg2<sub>Sd</sub>-Rgg box interaction schematic. Solid and dashed lines indicate H-bond interactions between Rgg box and the Rgg2<sub>Sd</sub> main chain and side chains, respectively. Arrows represent intermolecular hydrophobic interactions (<3.35 Å). Sidechains with ambiguous electron density are shaded grey. DNA phosphate is depicted as circles, ribose sugars as pentagons, and nucleotide bases as rectangles. Portions of the schematic were generated using NUCPLOT (21).

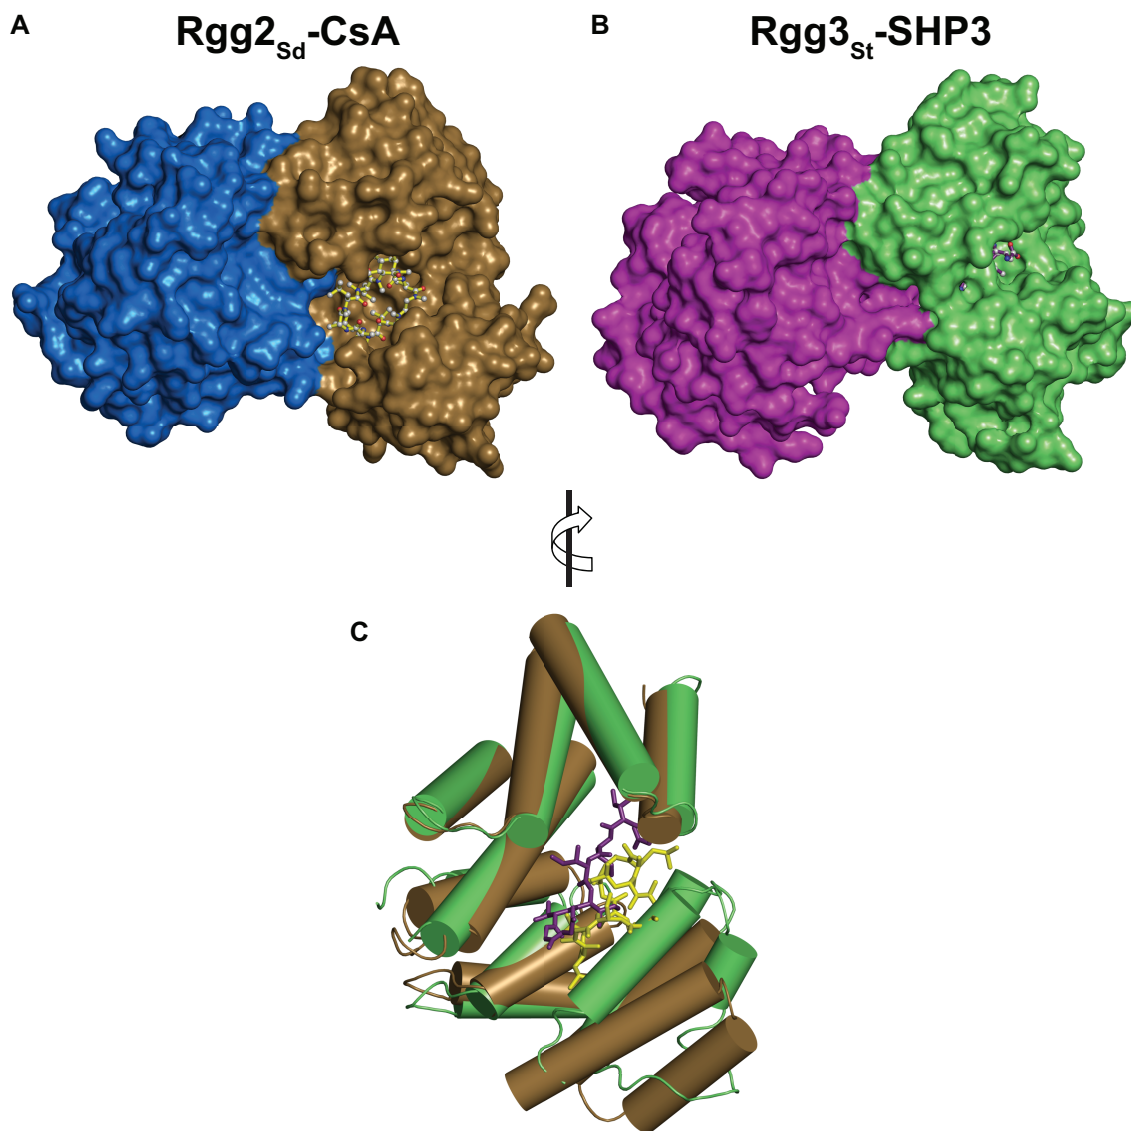

**Fig 3.** SHP3 and cyclosporin A bind to overlapping sites on their target Rgg proteins. (A) X-ray crystal structure of Rgg2<sub>sd</sub> dimer complexed with CsA (ball and stick model) (PDB 4YV9). (B) Cryo-EM structure of Rgg3<sub>st</sub> complexed with SHP3 (ball and stick model). For clarity, the Rgg2<sub>sd</sub> DNA binding domains are not shown. (C) Structural alignment of Rgg2<sup>B</sup><sub>sd</sub> (brown cylinders) bound to CsA<sup>F</sup> (yellow sticks) (PDB 4YV9) and Rgg3<sup>A</sup><sub>st</sub> (green cylinders) bound to SHP3 (purple sticks). For clarity, only one monomer of each Rgg2/3 dimer is shown, and the Rgg2<sup>B</sup><sub>sd</sub> DNA binding domain is omitted.

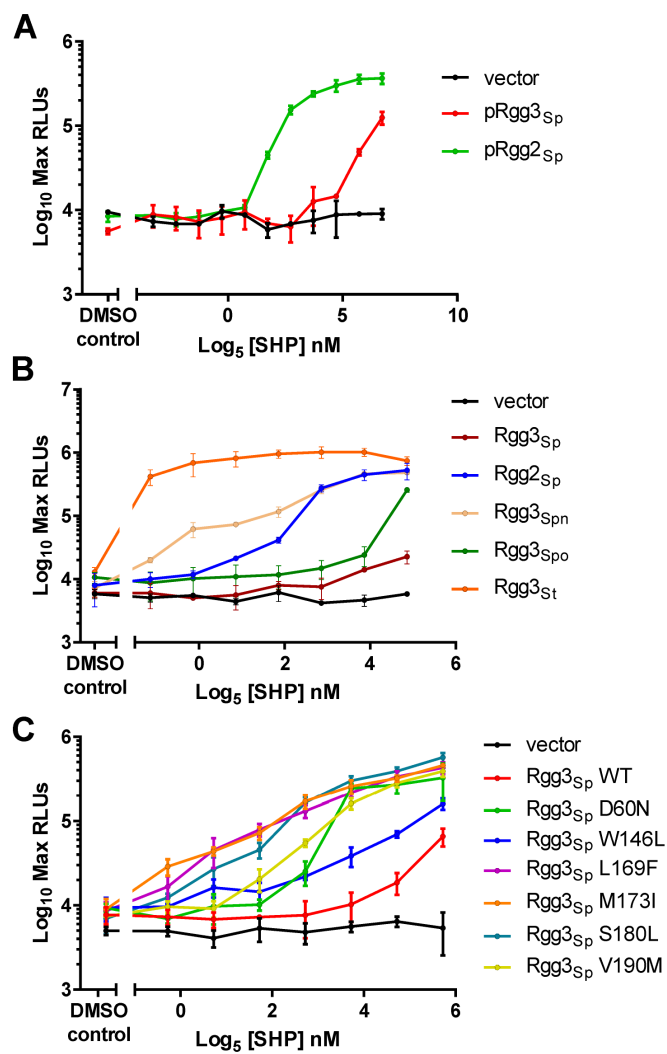

**Fig 4.** Rgg2 and Rgg3 proteins are transcriptional activators. Luciferase luminescence assays reporting chromosomally inserted *shp3* promoter fused to *luxAB* in a GAS host null for *rgg2*, *rgg3*,



*shp2*, *shp3* (strain KMT101). (A) Rgg<sub>2sp</sub> and Rgg<sub>3sp</sub> were individually expressed from plasmid pLZ12-spec (vector) in KMT101 and luciferase reporter activity was measured in response to SHP dosage. (B) Rgg homologs from *S. pyogenes* NZ131 (Sp), *S. pneumoniae* str. R6 (Spn), *S. porcinus* str. Jelinkova 176 (Spo), and *S. thermophilus* CNRZ1066 (St) were expressed in KMT101 as above. (C) Rgg<sub>3sp</sub> mutants expressed from plasmid pLZ12-spec (vector) in KMT101. Error bars indicate standard deviation from three independent biological replicates.

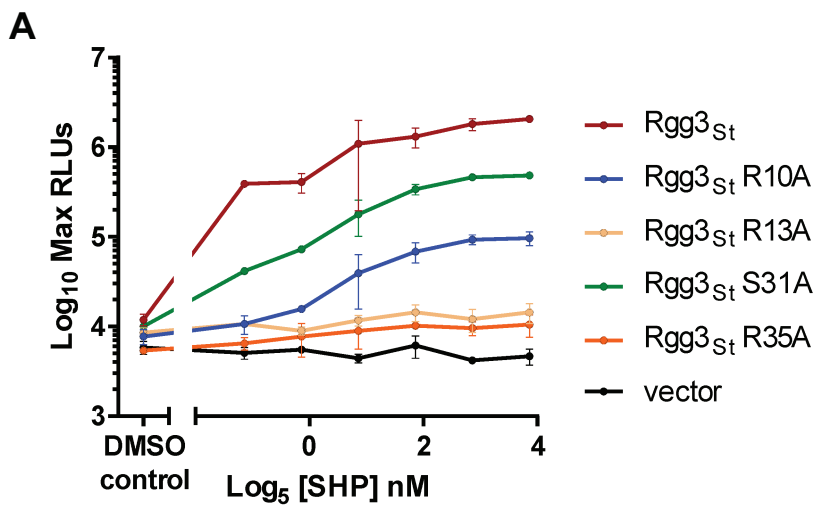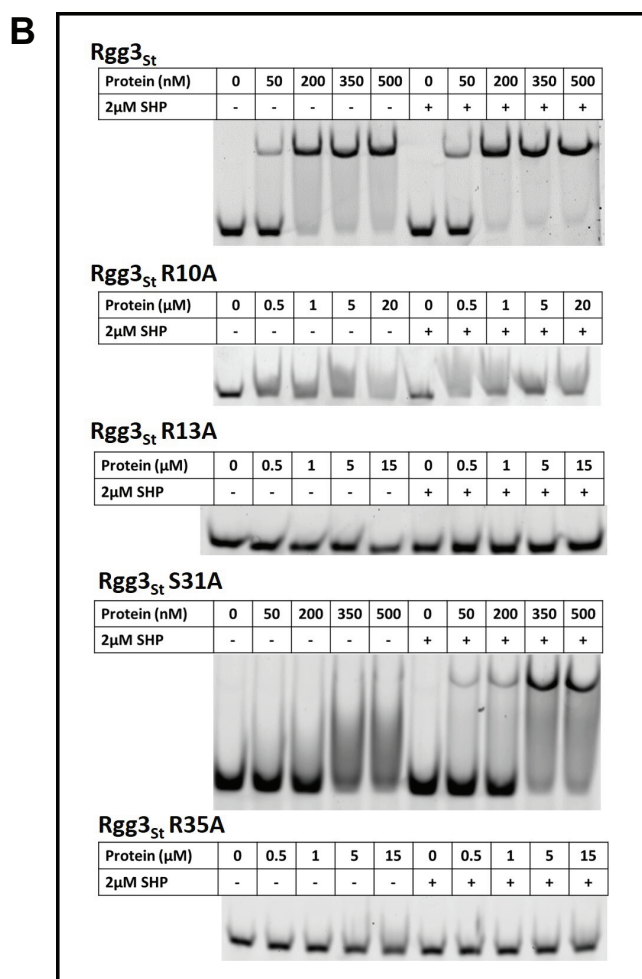

**Fig 5.** Functional importance of conserved DNA-binding Rgg3<sub>St</sub> amino acids. Comparison of Rgg3<sub>St</sub> alanine-substitution mutants to wild-type Rgg3<sub>St</sub> using an *in vivo* Pshp3 luciferase reporter assay (A) and *in vitro* using EMSAs (B). The mutations were introduced in a *S. pyogenes* strain containing *rgg3*<sub>St</sub> cloned from a gene synthesized codon-optimized for expression in *E. coli*. The EMSAs shown in (B) are representative of 2-3 independent experiments.

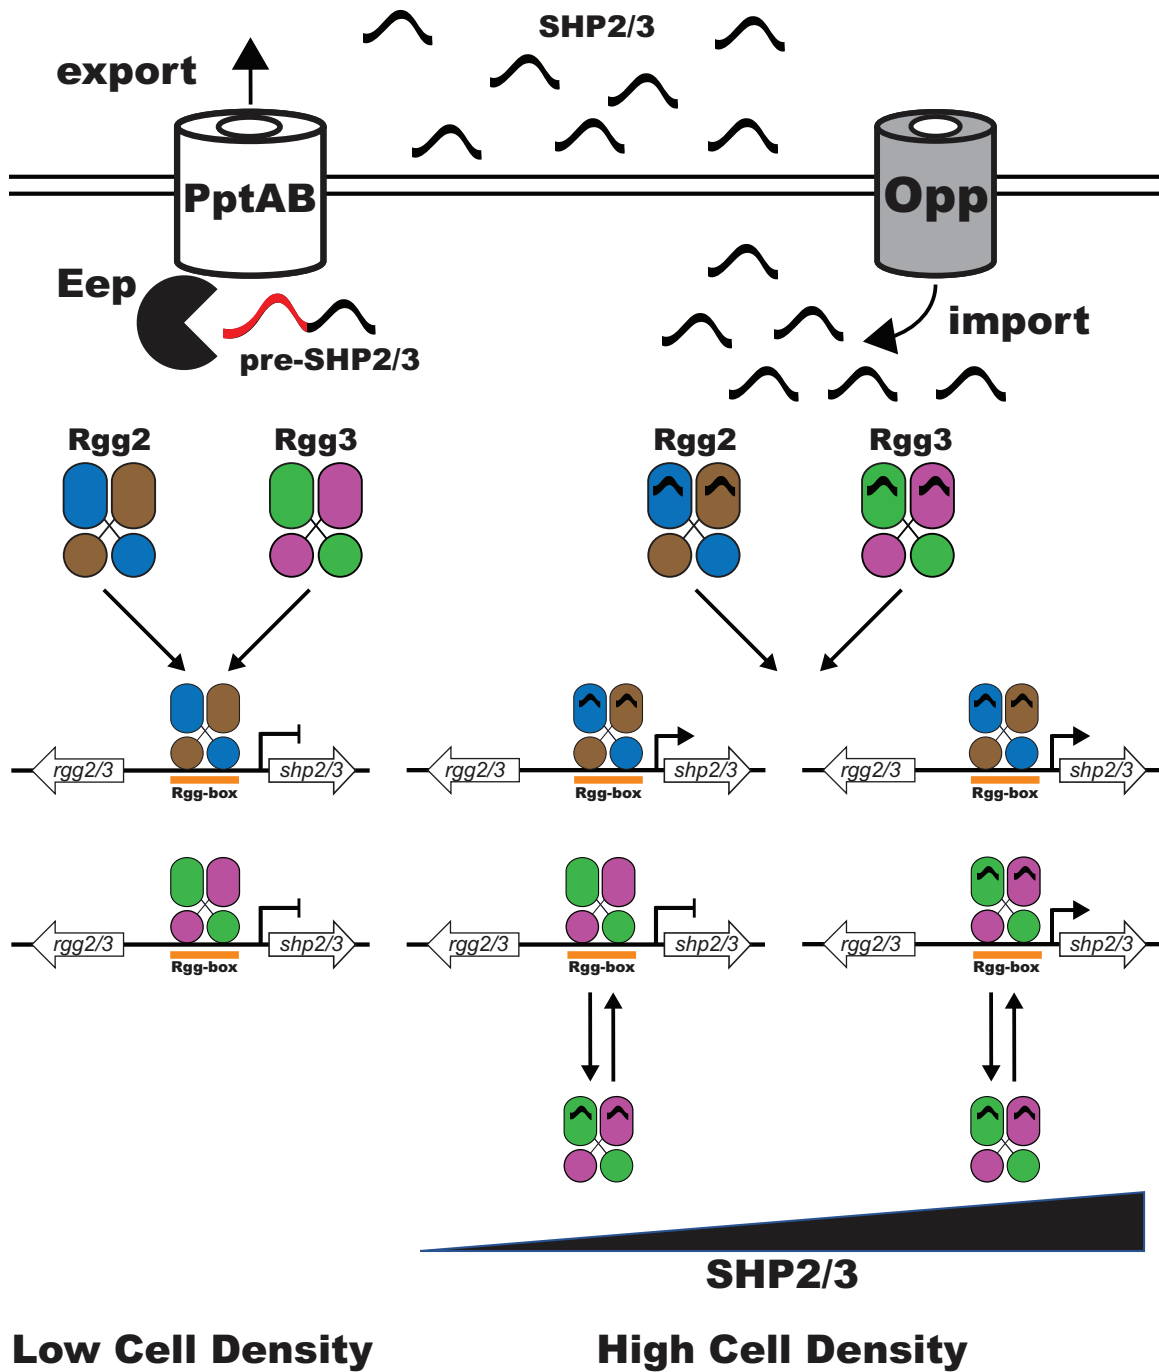

**Fig. 6.** Updated model of Rgg-SHP quorum-sensing signaling. In contrast to the existing model of Rgg-SHP signaling where Rgg2 proteins are transcriptional activators and Rgg3 proteins are transcriptional repressors, in the updated model Rgg2 and Rgg3 proteins are both SHP-dependent transcriptional activators. However, in streptococci such as *S. pyogenes* that contain more than one

Rgg-SHP signaling system, crosstalk, competition, and differential activation requirements result in complex interplay. For example, Rgg proteins such as Rgg3<sub>sp</sub> can function as repressors if they are in competition for promoter access with another Rgg protein such as Rgg2<sub>sp</sub> whose activation requires comparatively less SHP. Furthermore, in addition to triggering its transcriptional activity, SHP2 or SHP3 binding to Rgg3<sub>sp</sub> also appears to moderately reduce its affinity for DNA.

Supplementary Information for

Structural basis of Rgg protein binding to their regulatory pheromones and target DNA promoters

Glenn C. Capodagli, Kaitlyn M. Tylor, Jason T. Kaelber, Vasileios I. Petrou, Michael J. Federle, and Matthew B. Neiditch

Corresponding authors: Matthew B. Neiditch, Michael J. Federle, and Vasileios I. Petrou

Email: [matthew.neiditch@rutgers.edu](mailto:matthew.neiditch@rutgers.edu), [mfederle@uic.edu](mailto:mfederle@uic.edu), [vasileios.petrou@rutgers.edu](mailto:vasileios.petrou@rutgers.edu)

## Supplementary Materials and Methods

### Rgg2<sub>Sd</sub> Production

*S. dysgalactiae* *rgg2* was cloned in pTB146 as previously described (1). His-Sumo-Rgg2<sub>Sd</sub> was overexpressed in *E. coli* strain BL21(DE3) by first growing the cells at 37 °C in LB medium containing 100 µg/ml ampicillin to OD<sub>600</sub> = 0.5 and then inducing expression with 0.5 mM isopropyl β-D-1-thiogalactopyranoside (IPTG) for 4 h at 25 °C. The cells were collected by centrifugation and lysed in Buffer A (50 mM Tris·HCl [pH 8.0], 500 mM NaCl, 10% glycerol) supplemented with 20 µg/ml DNase. Lysate supernatant was applied to His-60 Ni resin (Clontech) equilibrated in Buffer A. His-Sumo-Rgg2<sub>Sd</sub> was eluted by washing the column with increasing amounts of imidazole and analyzed for purity using SDS-PAGE. Eluted protein was combined with 1.25 mg of the SUMO protease Ulp1 and dialyzed against 2 L of Buffer B (20 mM sodium phosphate buffer [pH 8.0], 150 mM NaCl, 10 mM β-ME, and 0.1% Triton X-100) overnight at 4 °C. The next day the protein was passed over His-60 Ni resin to separate the cleaved tag from the Rgg2<sub>Sd</sub> protein. The resulting cleaved protein, Rgg2<sub>Sd</sub>, was pooled, concentrated by ultrafiltration through a 10 kDa filter, and further purified by gel filtration using a Superdex 200 (GE Healthcare) 16/70 column equilibrated in Buffer C (20 mM Tris·HCl [pH 8.0], 150 mM NaCl). Rgg2<sub>Sd</sub> was concentrated using a 10 kDa MWCO centrifugal filter device and stored at –80 °C.

### Rgg3<sub>St</sub> Production

*S. thermophilus* *rgg3* (Rgg3<sub>St</sub>) was synthesized optimized for expression in *E. coli* (Genscript, Inc.). The Rgg3<sub>St</sub> expression construct encodes the 284 amino acids from GenPept entry WP\_011225998.1. A PCR product was generated using Phusion High-Fidelity DNA Polymerase (New England Biolabs) and the primer pair His-Sumo-Stherm\_F and His-Sumo-Stherm\_R (Table S3). This PCR product was cloned into the SapI and XhoI sites of pTB146 using the Gibson Assembly method (New England Biolabs) to give His-Sumo-Rgg3<sub>St</sub>. Growth, overexpression, and

purification followed the same protocol as used to produce Rgg2<sub>Sd</sub> with the addition of 5 mM DTT to Buffers A and C. Rgg3<sub>St</sub> was concentrated using a 10 kDa MWCO centrifugal filter device and stored at -80 °C.

### **Rgg2<sub>Sd</sub> and Rgg3<sub>St</sub> Mutation and Production**

Rgg2<sub>Sd</sub> mutant C45S was generated *de novo* in His-Sumo-Rgg2<sub>Sd</sub> using the QuickChange Lightning site-directed mutagenesis kit (Agilent) and verified by DNA sequencing. Rgg3<sub>St</sub> mutants R10A, R13A, S31A, R35A, and C45S were regenerated *de novo* in His-Sumo-Rgg3<sub>St</sub> using the QuickChange Lightning site-directed mutagenesis kit (Agilent) and verified by DNA sequencing. Growth, overexpression, and purification followed the same protocols described for Rgg2<sub>Sd</sub> and Rgg3<sub>St</sub>.

### **Rgg3<sub>St</sub>-SHP3 Cryo-EM Structure Determination**

Rgg3<sub>St</sub> was prepared as described above but during the final gel filtration step using a Superdex 200 (GE Healthcare) 16/70 column, the equilibration buffer contained 150 mM NaCl and 20 mM HEPES [pH 8.0]. SHP3 (DIIIVGG) was obtained from LifeTein, LLC and resuspended in DMSO. Rgg3<sub>St</sub>-SHP3 complex was prepared by incubating 30 μM Rgg3<sub>St</sub> and 360 μM SHP3 for 10 min at 25 °C.

EM grids were prepared using a Vitrobot Mark IV autopluger (FEI), with the environmental chamber at 22 °C and 100% relative humidity. More specifically, 2.5 μL Rgg3<sub>St</sub>-SHP3 was applied to glow-discharged UltraAuFoil (1.2/1.3) 300-mesh grids (Quantifoil), blotted with filter paper for 3-3.5 s, and flash-frozen by plunging in liquid ethane cooled with liquid nitrogen. Grids were then stored in liquid nitrogen.

Cryo-EM data were collected at the Rutgers New Jersey CryoEM/CryoET Core Facility using a 200 kV Talos Arctica (FEI/ThermoFisher) electron microscope equipped with a K2 Summit direct electron detector (Gatan) and a GIF Quantum energy filter (Gatan) with slit width of 20 eV.



Data were collected automatically in counting mode using EPU (FEI/ThermoFisher), a nominal magnification of 130,000X, a calibrated pixel size of 1.038 Å per pixel, and a dose rate of 6.347 electrons/pixel/s. Movies were recorded at 200 ms/frame for 8 s (40 frames total), resulting in a total radiation dose of 47.13 electrons/Å<sup>2</sup>. Defocus range was 0.5 to 3.5 μm. A total of 1,464 micrographs were recorded from two grids over two days. Micrographs were gain-normalized and defect corrected.

The processing workflow for the Rgg3<sub>St</sub>-SHP3 dataset is presented in Fig. S1B, with the processing completed entirely within cryoSPARC.v2 (2). Briefly, 1464 micrographs were subjected to patch motion correction and patch CTF estimation. After curation of exposures for estimated resolution, motion distance, motion curvature and ice thickness, 815 micrographs were selected for further processing. Blob picker was used to create templates directly from the data, which were then used with template picker to select 389k particles. These particles were extracted using a 192-pixel box binned to 96 pixels (2.076 Å/pix). The dataset was subjected to multi-class ab initio reconstruction and further 2D classification to yield a 263k particle stack which were re-extracted using an unbinned 256-pixel box. The resulting particles were subjected to two rounds of multi-class ab initio reconstruction with 4 classes, which were subsequently used as starting volumes for heterogeneous refinement. In both cases, the two higher resolution classes were selected for the next round. Subsequently, non-uniform refinement (3) was used, leading to a reconstruction at 3.37 Å from ~87k particles. Further cleaning of the dataset and a second run of cleanup from the initial stack (after subtracting the first clean particle stack) gave a stack of 129k particles with a 3.25 Å reconstruction. The particles were subjected to local motion correction with minimal effects. After verification that the resulting reconstruction volume is C2 symmetric, C2 symmetry was imposed and used in multi-class ab initio reconstructions to further clean the particle stack reducing noise in the reconstruction. The final stack consisted of ~44k particles from 428 micrographs, resulted in a 3.04 Å reconstruction after non-uniform refinement. Finally, the particle stack was subjected to global and local CTF refinement and symmetry expansion under C2

symmetry, leading to an effective particle stack of ~88k and a 2.95 Å reconstruction after local refinement. The final map was sharpened using phenix.auto\_sharpen (4).

The initial atomic model for Rgg3<sub>St</sub>-SHP3 was built by first manually aligning and then rigid model refining separately the two Rgg3<sub>St</sub> protomers from the X-ray crystal structure of Rgg3<sub>St</sub> alone into the Rgg3<sub>St</sub>-SHP3 cryo-EM map using Coot (5). Subsequent refinement and building of the model was performed using phenix.real\_space\_refine (6-8) and Coot, respectively. Real-space refinement included global minimization and atomic-displacement parameter (ADP or B-factors) refinement. Restraints included standard geometric, secondary structure, non-crystallographic symmetry (NCS), rotamer, and Ramachandran. Comprehensive model validation was carried out using phenix.validation\_cryoem (Table S1). In addition, EMRinger was utilized for model-map validation, yielding an excellent score (Table S1)(9). The 3DFSC server was also used to generate a directional FSC estimate and sphericity measure (10). Molecular graphics for the cryo-EM map were generated using UCSF Chimera and ChimeraX (11, 12).

For the Euler angle distribution plot, the final particles.cs file into a .star file using the UCSF pyem csparc2star.py program and then converting the .star file into a .bild file using the star2bild.py program (Asarnow, D., Palovcak, E., Cheng, Y. UCSF pyem v0.5. Zenodo <https://doi.org/10.5281/zenodo.3576630> (2019)). UCSF Chimera was used for visualization of the Euler angle distribution (11).

### **Crystallization and Diffraction Data Collection**

Crystals of Rgg2<sub>Sd</sub> in complex with its Rgg box (annealed oligos pSHP2DNA\_top and pSHP2DNA\_bot) were obtained via the vapor diffusion method by first incubating 86 μM Rgg2<sub>Sd</sub> with 128 μM Rgg box at room temperature for 10 minutes. After incubation, hanging drops were created using 2 μL of the Rgg2<sub>Sd</sub>-Rgg box mixture combined 1:1 with a mother liquor containing 100 mM trilithium citrate and 24% PEG 3,350 at 20 °C. Prior to X-ray diffraction data collection, crystals were moved to a solution of the mother liquor supplemented with 7% glycerol. X-ray

diffraction data for Rgg2<sub>sd</sub>-Rgg box were collected using single crystals mounted in nylon loops that were then flash-cooled in liquid nitrogen before data collection in a stream of dry N<sub>2</sub> at 100 K. X-ray diffraction data were collected at the Stanford Synchrotron Radiation Lightsource (SSRL) beamline 14-1 at 1.1808 Å with a MARmosaic 325 CCD detector.

Crystals of Rgg3<sub>st</sub> in complex with its Rgg box (annealed oligos pSHP3DNA\_top and pSHP3DNA\_bot) were obtained via the vapor diffusion method by first incubating 133 μM Rgg3<sub>st</sub> with 133 μM Rgg box and 2.5% dimethyl sulfoxide (DMSO) at room temperature for 10 minutes. After incubation, hanging drops were created using 2 μL of the Rgg3<sub>st</sub>-Rgg box mixture combined 1:1 with mother liquor containing 170 mM ammonium acetate, 85 mM sodium citrate (pH 5.5), 22% PEG 4,000, and 15% glycerol at 20 °C. X-ray diffraction data for Rgg3<sub>st</sub>-Rgg box were collected using single crystals mounted in nylon loops that were then flash-cooled in liquid nitrogen before data collection in a stream of dry N<sub>2</sub> at 100 K. X-ray diffraction data were collected at SSRL beamline 9-2 at 0.97946 Å with a Dectris Pilatus 6M detector.

Rgg3<sub>st</sub> crystals were obtained via the vapor diffusion method with 2 μL drops containing 125 μM Rgg3<sub>st</sub> and 2.5% DMSO combined 1:1 with mother liquor containing 100 mM sodium citrate (pH 5.2), 300 mM Na/K tartrate, and 1.4 M ammonium sulfate. X-ray diffraction data for Rgg3<sub>st</sub> were collected using single crystals mounted in nylon loops that were then flash-cooled in liquid nitrogen before data collection in a stream of dry N<sub>2</sub> at 100 K. X-ray diffraction data were collected at SSRL beamline 9-2 at 0.97946 Å with a Dectris Pilatus 6M detector.

X-ray diffraction data for all crystals were processed using HKL3000 (13). Initial crystallographic phases were determined by molecular replacement using Phaser (14) and the previously determined structure of Rgg2<sub>sd</sub> (PDB ID 4YV6) (1) as a search model for Rgg2<sub>sd</sub>-Rgg box and Rgg3<sub>st</sub>-Rgg box. The final models were generated using iterative cycles of model building in Coot (5) and refinement in phenix.refine (6). Initial refinement included simulated annealing as well as rigid body, individual atomic coordinate, and individual B-factor refinement. Later rounds of refinement employed individual atomic coordinate, individual B-factor, and TLS refinement.

TLS groups were selected using the TLSMD server (15). During the final rounds of refinement, the stereochemistry and ADP weights were optimized. Insufficient electron density was observed for the following residues in flexible regions of the protein structures, and they were omitted from the model: Rgg2<sub>sd</sub>-Rgg box residues 1-2 and 277-284 in chain A, and 1-3 and 277-284 in Chain B; Rgg3<sub>st</sub> residues 1-77 and 101-105; Rgg3<sub>st</sub>-Rgg box residues 1-3 and 284. Ramachandran statistics were calculated in Molprobity (16). Molecular graphics were produced with PyMOL (PyMOL Molecular Graphics System, Version 1.8 Schrödinger, LLC).

### **Rgg2<sub>sd</sub> and Rgg3<sub>st</sub> Disulphide Bond Analysis**

10 µg of Rgg2<sub>sd</sub>, Rgg2<sub>sd</sub>-C45S, Rgg3<sub>st</sub>, and Rgg3<sub>st</sub>-C45S were incubated with SDS loading dye (2% SDS, 10% glycerol, 0.1% bromophenol blue, and 100 mM Tris·HCl [pH 6.8]) with and without 50 mM DTT at room temperature for 10 min. Samples were then heated to 95 °C for 5 min, cooled on ice for 10 min, and then centrifuged at 1,000 × g for 1 min at room temperature. 10 µL of each sample were analyzed using 12% SDS-PAGE at 200 V for 45 min.

### **Sequence Alignments**

Alignment and similarity calculations were obtained using Clustal Omega and the ESPript 3.0 server using the %Equivalent similarity coloring scheme and a global score of 0.7. Coloring is with respect to identical (red), highly similar (yellow), or below the threshold (white) (17, 18). Aligned sequences include Rgg2 from *S. dysgalactiae* (S. dysg; WP\_014612092.1), *S. canis* (WP\_003047105.1), *S. agalactiae* (S. agal; AKI95852.1), *S. ictaluri* (S. ictal; WP\_008088263.1), and *S. pyogenes* (S. pyog; WP\_002990747.1), and Rgg3 from *S. pyogenes* (S. pyog; WP\_012560528.1), *S. pneumoniae* (S. pneumo; WP\_016397759.1), *S. mitis* (WP\_042900990.1), *S. porcicus* (S. porc; WP\_143920769.1), and *S. thermophilus* (S. thermo; WP\_011225998.1).

### **Rgg3<sub>st</sub> Luciferase Reporter Transcriptional Bioassays**

These assays were conducted as previously described (1). Briefly, overnight cultures of GAS were diluted 1:100 into chemically defined medium containing 100  $\mu\text{g}/\text{mL}$  spectinomycin. Cultures were incubated at 37° C until reaching an  $\text{OD}_{600}$  of 0.1, at which time 100  $\mu\text{L}$  of culture was transferred to a 96-well clear-bottomed plate containing indicated concentrations of synthetic SHP3-C8 peptide (DIIIVGG). A 1% decyl aldehyde solution, the substrate for the luciferase enzyme, suspended in mineral oil, was placed between wells of the microtiter plate. Luminescence and  $\text{OD}_{600}$  readings were recorded every 5 minutes using a BioTek Synergy2 plate reader. Relative light units (RLUs) were calculated by dividing the luminescence values (counts per second) by the corresponding  $\text{OD}_{600}$  values. Strain KMT101 served as the host GAS strain for *rgg* orthologs and mutants expressed from plasmid pLZ12-spec. KMT101 was engineered to delete *rgg2* in a strain already containing a deletion of *rgg3* and missense mutations of start codons for both *shp2* and *shp3* (BNL193 *rgg3::cat shp2<sub>GGG</sub> shp3<sub>GGG</sub>* (19)).

### **Electrophoretic Mobility Shift Assays**

The EMSA DNA probe was generated *in vitro* using 5'-FAM-tagged oligonucleotide pair BL63/BL64 (19) in 50 mM Tris and 100 mM NaCl, pH 7.5. DNA probes were annealed in a thermocycler by cooling from 95 °C to 15 °C over 160 minutes and treating with exonuclease I (New England Biolabs) to remove single-stranded DNA. For DNA binding experiments, recombinant purified protein was incubated with 10 nM of the prepared fluorescent probe in 20 mM HEPES buffer pH 7.9, 20 mM KCl, 5 mM  $\text{MgCl}_2$ , 0.2 mM EDTA, 0.5 mM  $\text{CaCl}_2$ , 10 mg/mL BSA, 12% v/v glycerol, and 0.5 mM DTT for 30 minutes at room temperature. sSHP3-C8 was added to a final volume of 2  $\mu\text{M}$  in indicated reactions; an equal volume of DMSO was added to reactions omitting sSHP3-C8. Samples were loaded onto native polyacrylamide gels buffered with 20 mM potassium phosphate, pH 7.5. Gels were run at 4 °C for 40 minutes at 100 V and fluorescently imaged using a Typhoon phosphorimager (GE Life Sciences).

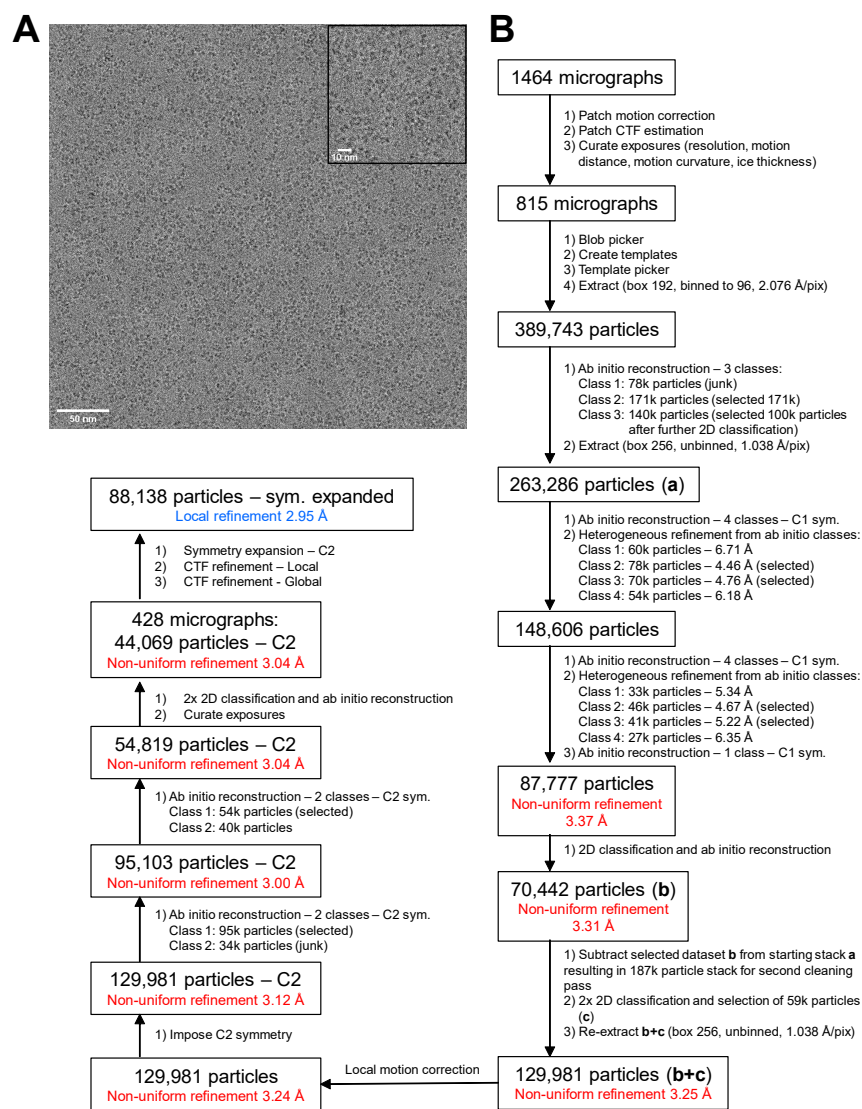

**Fig. S1.** Rgg3<sub>St</sub>-SHP3 cryo-EM structure determination. (A) Representative electron micrograph of Rgg3<sub>St</sub>-SHP3. The scale bar was added with the Fiji implementation of ImageJ (~4x binned, 0.4154 nm per pixel) (20). The inset shows a ~2x magnified view of particles from the micrograph.

(B) Data processing workflow used to enable high-resolution reconstruction of the Rgg3<sub>St</sub>-SHP3 complex. The workflow is further described in the relevant Supplementary Materials and Methods section.

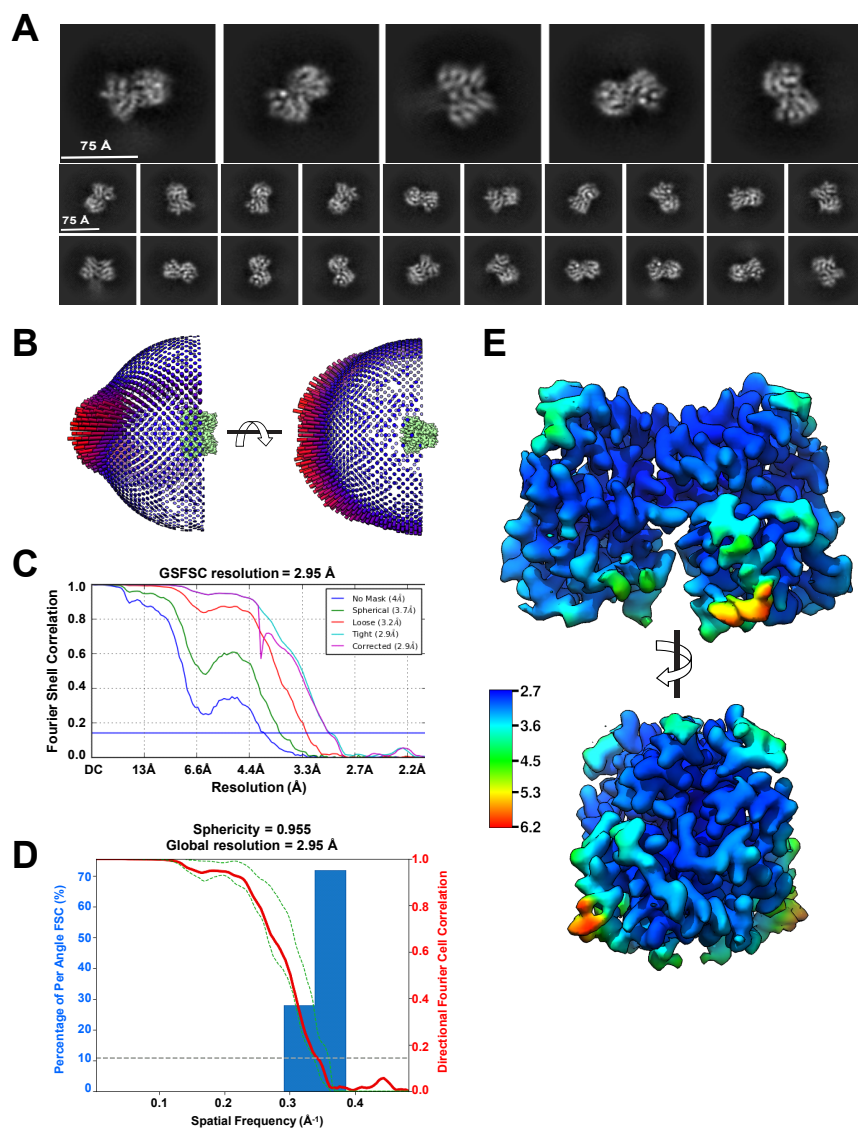

**Fig. S2.** Rgg3<sub>S</sub>-SHP3 cryo-EM data quality and validation. (A) Two-dimensional class averages after reference-free two-dimensional classification of the final particle stack in cryoSPARC.v2 (re-extracted in a 144-pixel box, ~150 Å). Five majority classes are shown on the top row, with the remainder classes presented below in smaller tiles. (B) Euler angle distribution plot of the final



Rgg3<sub>st</sub>-SHP3 particle stack in two directions. See Supplementary Materials and Methods for a description of how this plot was created (C) Fourier shell correlation (FSC) curve for Rgg3<sub>st</sub>-SHP3 generated after the final local refinement in cryoSPARC.v2. (D) Directional FSC curve generated using the 3DFSC server (10). Embedded histograms of directional resolution are shown in blue. Global FSC is shown in red, and  $\pm 1$  S.D. from the mean of directional FSC is shown as green dashed lines. (E) Local resolution of Rgg3<sub>st</sub>-SHP3 mapped to the final unsharpened reconstruction in two orthogonal views. Local resolution was estimated using an implementation of the blocres program (21) in cryoSPARC.v2 (2). The coloring scale shows a range of resolution from deep blue (2.7 Å) to red (6.2 Å).

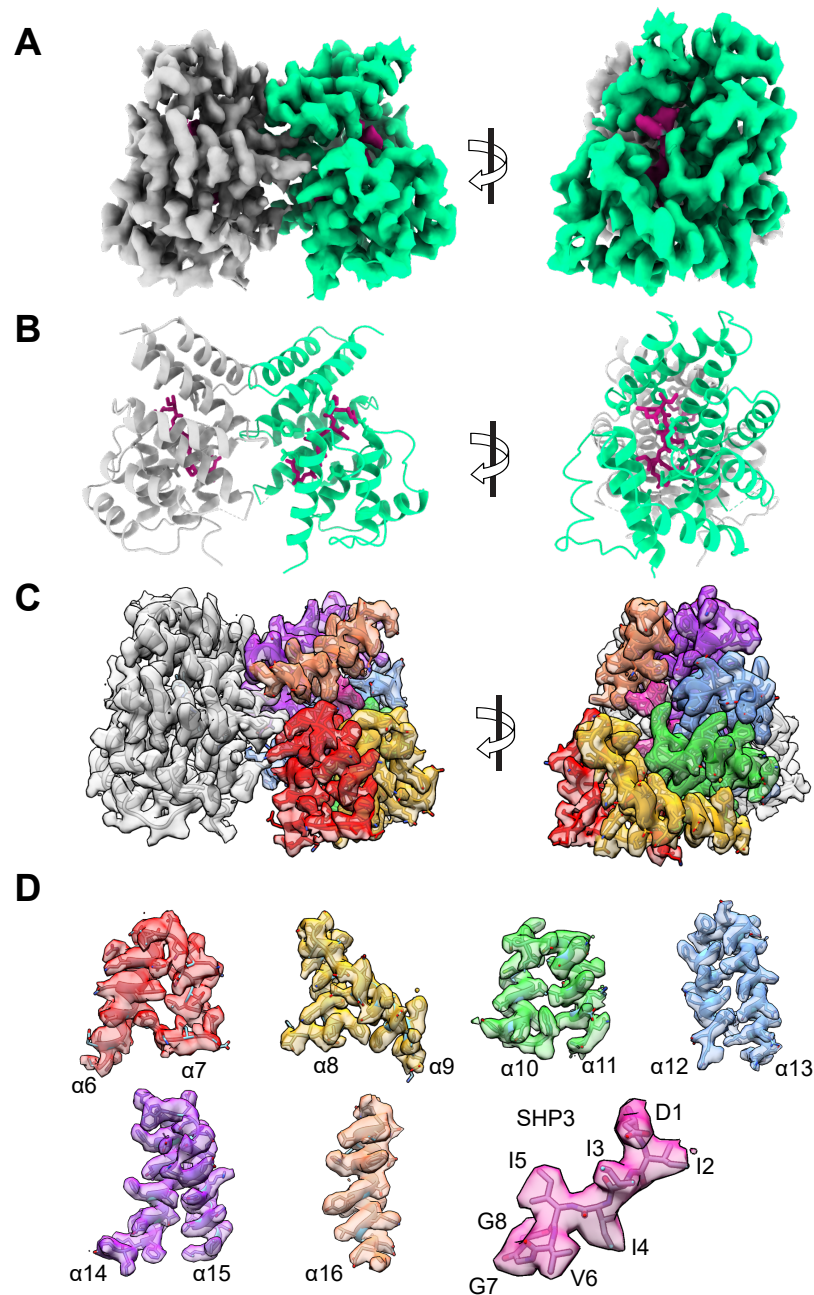

**Fig. S3.** Rgg3<sub>Sr</sub>-SHP3 cryo-EM map and model. (A) Cryo-EM map of the Rgg3<sub>Sr</sub>-SHP3 complex at 2.95 Å nominal resolution, contoured at 7.5  $\sigma$ . Subunit A is shown in green color. The SHP3 peptide is shown in magenta. Two orthogonal views are presented. This representation was

generated with Chimera X (12). (B) Ribbon representation of the model corresponding to (A) with a matching color scheme. (C) Superposition of the cryo-EM map and corresponding model of the Rgg3St-SHP3 complex. The map is contoured at  $6.5 \sigma$  and it is colored according to the color scheme shown in Fig. 1A,B for the repeat domain helices. This representation was generated with Chimera (11). (D) Extracted densities from the cryo-EM to showcase the quality of the map, with corresponding portion of the model superimposed. The map was contoured at  $6.5 \sigma$  before extracting the partial densities. The density corresponding to the SHP3 peptide from subunit A is shown with magenta coloring and the SHP3 peptide model superimposed. The individual amino acids (DIIIVGG) are marked in sequence.

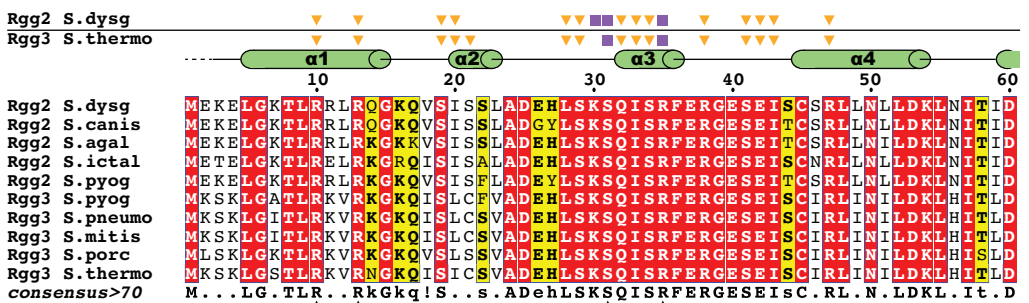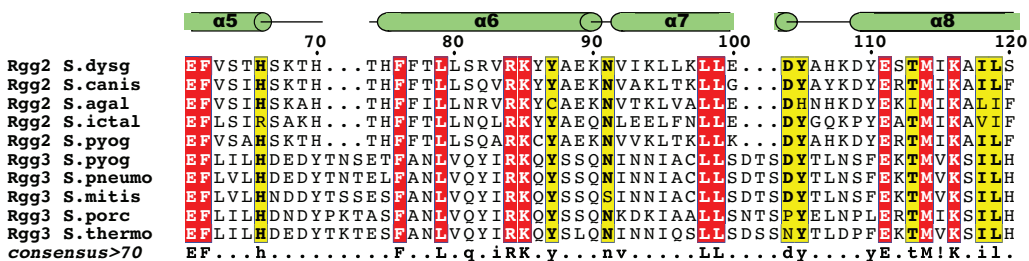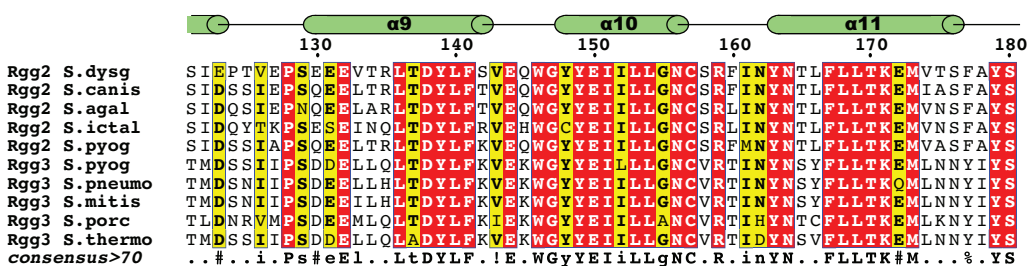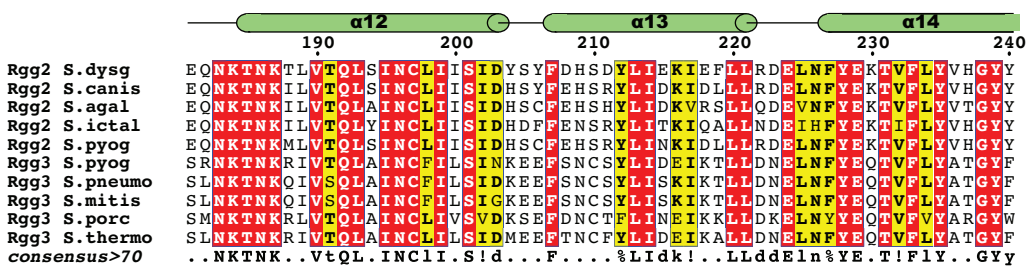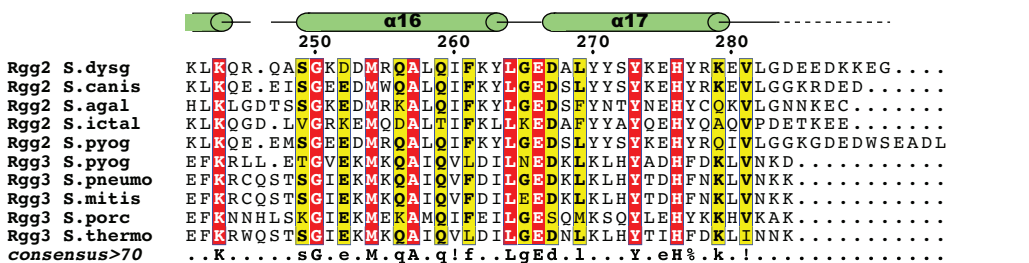

**Fig. S4.** Sequence alignment of representative Rgg2 and Rgg3 proteins. Amino acid numbering and secondary structure elements i.e.,  $\alpha$ -helices (green cylinders) and loops (black lines), correspond to Rgg3<sub>St</sub>, Rgg2<sub>Sd</sub> and Rgg3<sub>St</sub> residues that interact with the Rgg-box phosphate backbone (orange triangles) or nucleotide base (purple squares) are indicated. Residues mutated to alanine and tested in EMSAs are indicated by a black star beneath the consensus sequence and colored as described in Methods.

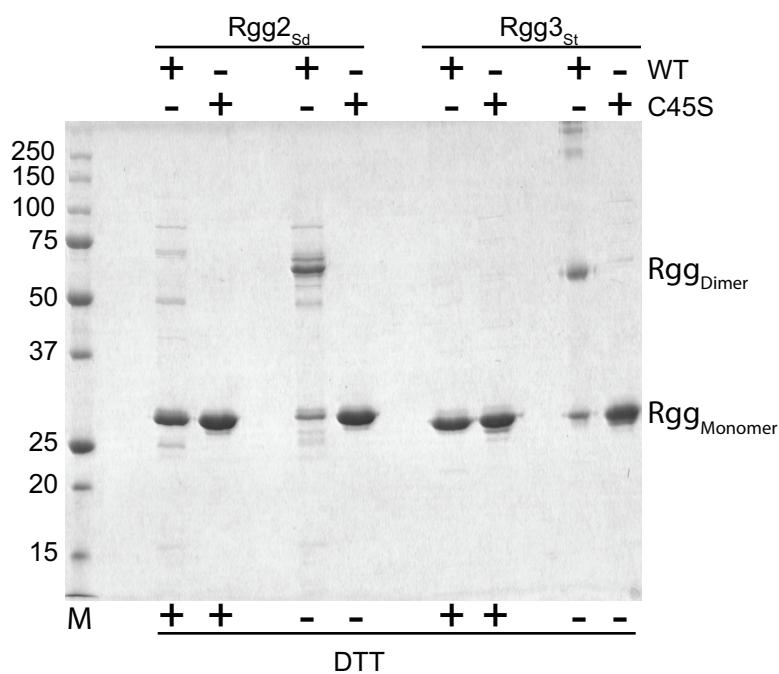

**Fig. S5.** *In vitro* formation of the Rgg3<sub>St</sub> intermolecular disulphide bond. Samples of Rgg3<sub>St</sub> were boiled in the presence or absence of DTT before analysis by SDS/PAGE as described in Methods. M, molecular weight standards.

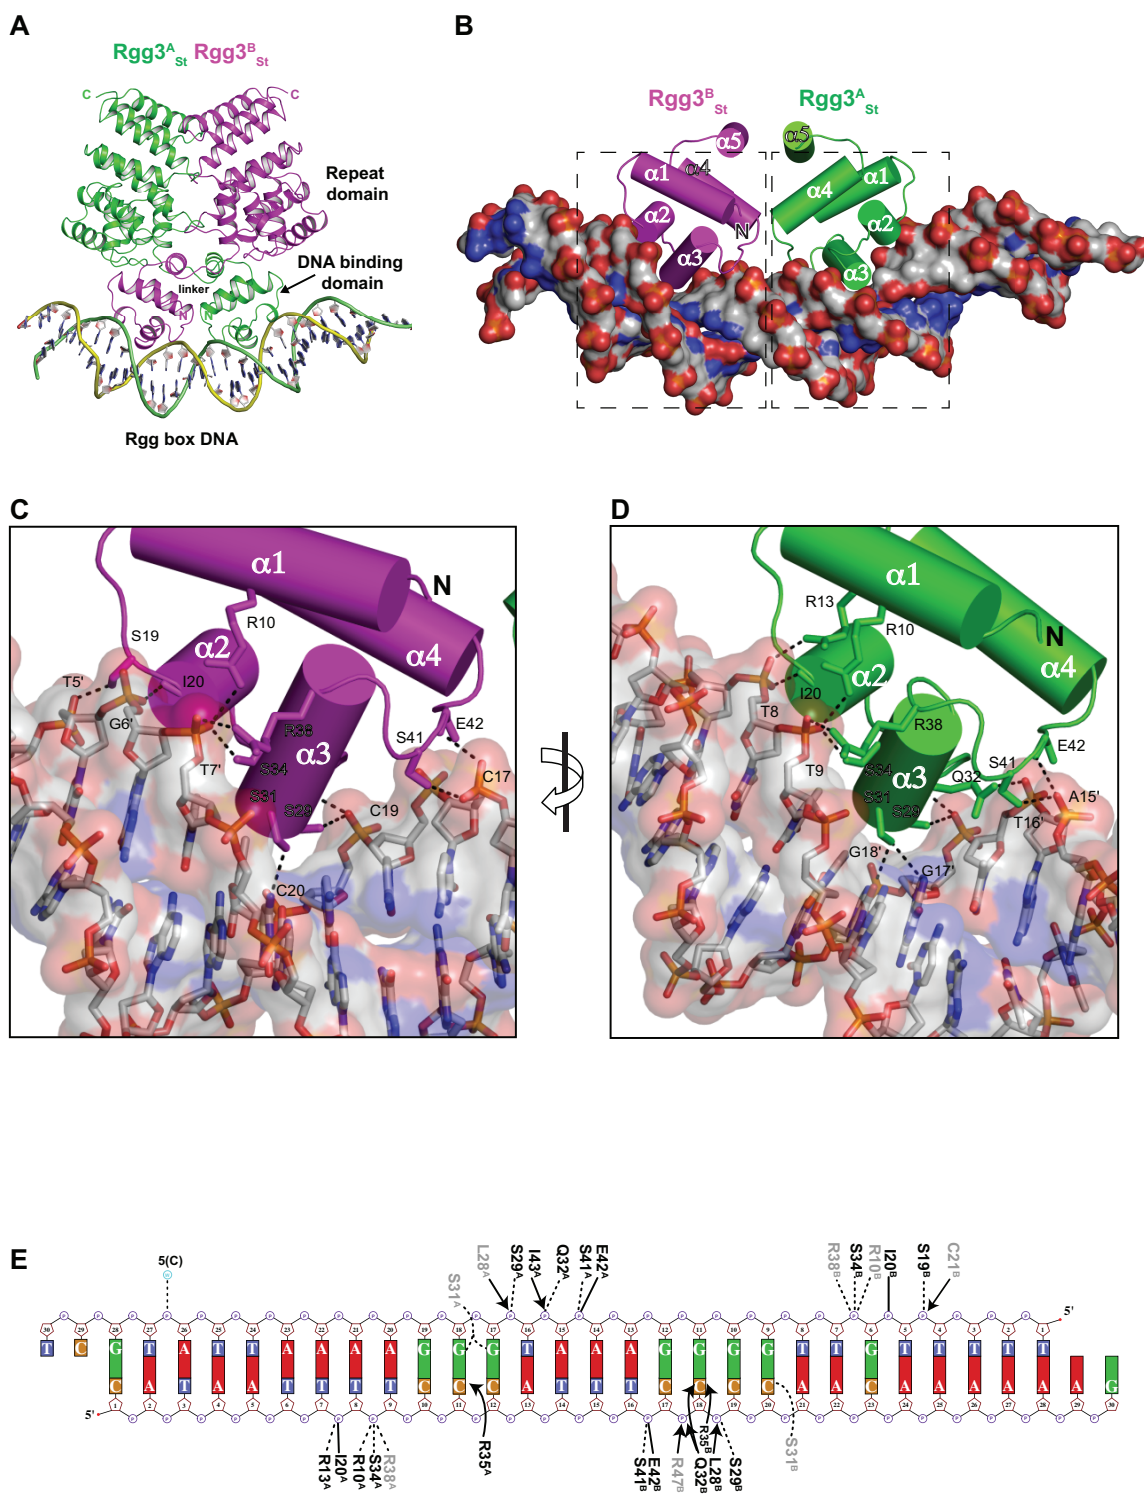

**Fig. S6.** Crystal structure of Rgg3<sub>st</sub> bound to Rgg3-box DNA. (A) Rgg2<sub>sd</sub> dimer bound to Rgg2-box DNA. (B) Isolated view of the Rgg3<sub>st</sub> DNA binding domains (cylindrical helices) in complex with Rgg-box DNA (surface rendering colored by element). (C and D) Expanded view of the areas

enclosed by the dashed black rectangles on the left or right in panel B, respectively. The structures were rotated slightly to provide a clear view of the Rgg4<sub>St</sub>-Rgg box interactions. Rgg-box is depicted as a semi-transparent surface and sticks. Rgg3<sub>St</sub> side chains or main chains that interact with Rgg-box are labeled and shown as sticks. Hydrogen bonds are depicted as dashed lines. (E) Rgg3<sub>St</sub>-Rgg box interaction schematic. Solid and dashed lines indicate H-bond interactions between Rgg box and the Rgg3<sub>St</sub> main chain and side chains, respectively. Arrows represent intermolecular hydrophobic interactions (<3.35 Å). Sidechains with ambiguous electron density are shaded grey. DNA phosphate is depicted as circles, ribose sugars as pentagons, and nucleotide bases as rectangles. Portions of the schematic were generated using NUCPLOT (22).



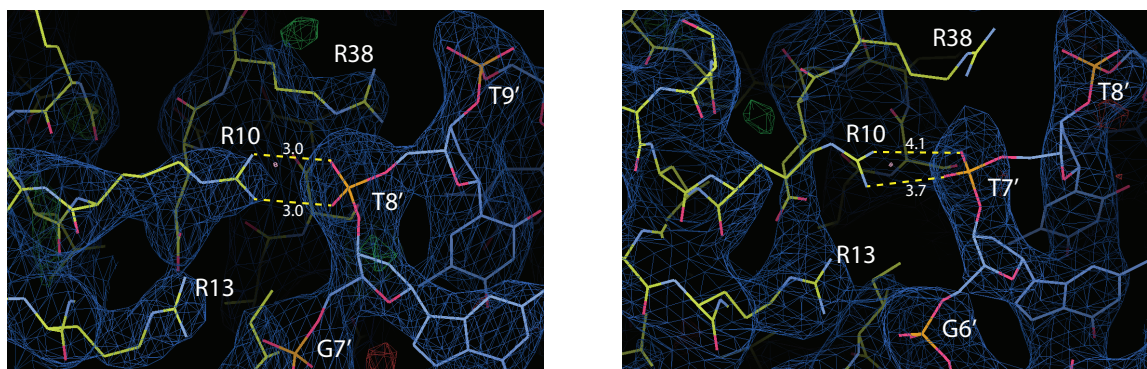

**Fig. S7.** Representative Rgg2<sub>sd</sub>-Rgg box and Rgg3<sub>st</sub>-Rgg box electron density. Electron density around R10, R13, and R38 in Rgg2<sup>B</sup><sub>sd</sub>-Rgg box (left) and Rgg3<sup>B</sup><sub>st</sub>-Rgg box (right). Protein residues are depicted as yellow sticks, DNA nucleotides as blue sticks. The blue mesh represents the 2F<sub>o</sub>-F<sub>c</sub> map scaled to 1.0  $\sigma$ . The green and red mesh represent the positive and negative contour F<sub>o</sub>-F<sub>c</sub> map scaled to 3.0  $\sigma$ , respectively. Dashed lines indicate distances measured in Å. Image generated in Coot (5).

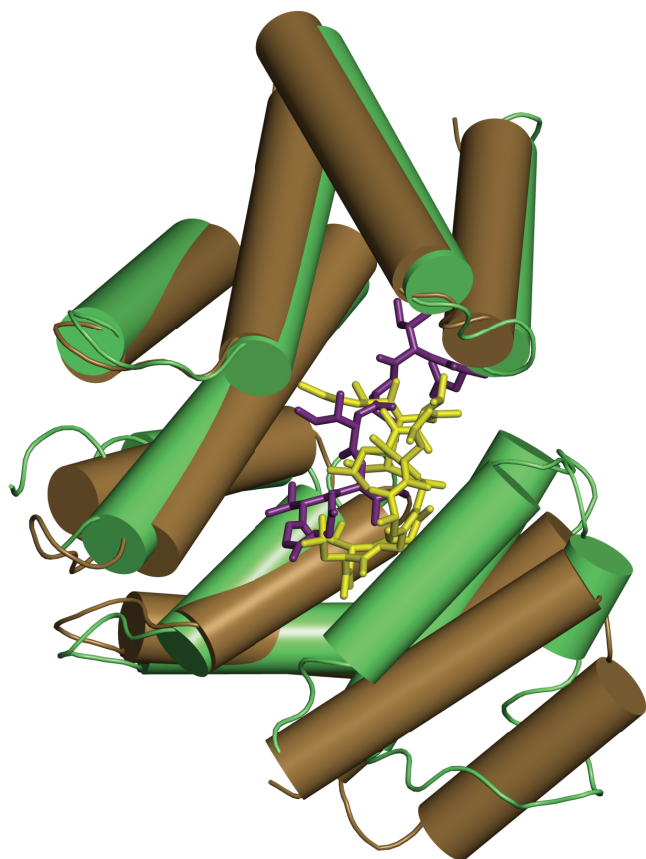

**Fig. S8.** SHP3 and cyclosporin A bind to overlapping sites on their target Rgg proteins. Structural alignment of Rgg3<sup>A<sub>st</sub></sup> (green cylinders) bound to SHP3 (yellow sticks), and Rgg2<sup>A<sub>sd</sub></sup> (brown cylinders) bound to CsA<sup>E</sup> (yellow sticks)(PDB 4YV9). For clarity, the Rgg2<sup>A<sub>sd</sub></sup> DNA binding domain is not shown, and only one monomer of each Rgg2/3 dimer is shown.

**Table S1.** Cryo-EM data collection, refinement, and validation statistics for Rgg3<sub>St</sub>-SHP3 complex structure.

| <b>Rgg3<sub>St</sub>-SHP3</b>             |                         |
|-------------------------------------------|-------------------------|
| PDB code                                  | TBD                     |
| EMDB code                                 | TBD                     |
| <b>Data collection and processing</b>     |                         |
| Microscope                                | Talos Arctica           |
| Camera                                    | Gatan K2 Summit         |
| Energy Filter                             | Gatan BioQuantum (20eV) |
| Magnification (nominal)                   | 130,000                 |
| Voltage (kV)                              | 200                     |
| Exposure time (s)                         | 8                       |
| Dose rate (e-/pixel/s)                    | 6.347                   |
| Electron exposure (e-/Å <sup>2</sup> )    | 47.13                   |
| Defocus range (µm)                        | -0.5 to -3.0            |
| Pixel size (Å)                            | 1.038                   |
| Box size (pixels)                         | 256                     |
| Symmetry imposed                          | C2                      |
| Micrographs (no.)                         | 1464                    |
| Initial particle images (no.)             | 389,743                 |
| Final micrographs (no.)                   | 428                     |
| Final particle images (no.)               | 44,069                  |
| Map resolution (Å)                        | 2.95                    |
| FSC threshold                             | 0.143                   |
| Map resolution range (Å)                  |                         |
| Local (Å)                                 | 2.7-6.2                 |
| 3DFSC Sphericity                          | 0.955                   |
| <b>Refinement</b>                         |                         |
| Initial model used (PDB code)             | Rgg3 alone (6W1E)       |
| Model resolution (Å)                      | 3.1                     |
| FSC threshold                             | 0.5                     |
| model resolution range (Å)                | 2.7-6.2                 |
| map sharpening B factor (Å <sup>2</sup> ) | 89.51                   |
| Residue range                             | 71-283                  |
| Model composition                         |                         |
| non-hydrogen atoms                        | 3556                    |
| protein residues                          | 432                     |
| ligands                                   | 0                       |

|                                  |                   |             |
|----------------------------------|-------------------|-------------|
| <b>B factors (Å<sup>2</sup>)</b> | min/max/mean      |             |
| protein                          | 45.28/92.66/60.03 |             |
| ligand                           | -                 |             |
| <b>R.M.S. deviations</b>         |                   |             |
| Bond lengths (Å)                 | 0.003             |             |
| Bond angles (°)                  | 0.470             |             |
| <b>Validation</b>                |                   |             |
| MolProbity score                 | 2.07              |             |
| Clashscore                       | 3.80              |             |
| Poor rotamers (%)                | 5.91              |             |
| Cβ outliers (%)                  | 0.00              |             |
| CaBLAM outliers (%)              | 1.23              |             |
| EM-Ringer score                  | 4.43              |             |
| <b>Ramachandran plot</b>         |                   |             |
| Favored (%)                      | 95.48             |             |
| Allowed (%)                      | 4.52              |             |
| Disallowed (%)                   | 0.00              |             |
| <b>Resolution Estimates (Å)</b>  | Masked            | Unmasked    |
| d FSC (half maps; 0.143)         | 3.1               | 3.2         |
| d 99 (full/half1/half2)          | 3.1/2.1/2.1       | 3.0/2.1/2.1 |
| d model                          | 3.1               | 3.1         |
| d FSC model (0/0.143/0.5)        | 2.6/2.8/3.1       | 2.6/2.9/3.2 |
| <b>Model vs. Data</b>            |                   |             |
| CC (mask)                        | 0.85              |             |
| CC (box)                         | 0.80              |             |
| CC (peaks)                       | 0.76              |             |
| CC (volume)                      | 0.84              |             |

**Table S2.** Statistics for X-ray crystallographic data collection and refinement

| <b>PDB ID</b>                               | Rgg2 <sub>Sd</sub> -Rgg box<br>6W1A | Rgg3 <sub>St</sub><br>6W1E       | Rgg3 <sub>St</sub> -Rgg box<br>6W1F |
|---------------------------------------------|-------------------------------------|----------------------------------|-------------------------------------|
| <b>Data collection</b>                      |                                     |                                  |                                     |
| Space group                                 | P6 <sub>5</sub>                     | P3 <sub>2</sub> 21               | P6 <sub>5</sub>                     |
| Cell dimensions<br>a, b, c (Å)              | 110.27, 110.27,<br>174.00           | 110.36, 110.36,<br>54.93         | 90.79, 90.79, 245.10                |
| $\alpha, \beta, \gamma$ (°)                 | 90.0, 90.0, 120.0                   | 90.0, 90.0, 120.0                | 90.0, 90.0, 120.0                   |
| Resolution (Å)                              | 50.00-2.80 (2.90-<br>2.80)          | 50.00-2.20 (2.26-<br>2.20)       | 50.00-3.20 (3.29-<br>3.20)          |
| Wavelength (Å)                              | 1.18076                             | 0.97946                          | 0.97946                             |
| Completeness (%)                            | 99.9 (99.7)                         | 97.7 (86.7)                      | 99.5 (100.0)                        |
| R <sub>sym</sub> (%)                        | 10.2 (151.8)                        | 8.1 (47.3)                       | 5.4 (66.4)                          |
| CC <sup>1/2</sup>                           | 0.999 (0.648)                       | 0.998 (0.939)                    | 0.986 (0.896)                       |
| Average I / $\sigma$ I                      | 31.1 (1.8)                          | 42.6 (2.3)                       | 35.4 (2.5)                          |
| Redundancy                                  | 8.3                                 | 9.4                              | 10.3                                |
| Total reflections                           | 245,818                             | 181,920                          | 193,899                             |
| Unique reflections                          | 29,533                              | 19,380                           | 18,729                              |
| <b>Refinement</b>                           |                                     |                                  |                                     |
| R <sub>work</sub> / R <sub>free</sub> (%)   | 23.35 (35.17) / 26.43<br>(34.82)    | 26.51 (34.41) / 30.86<br>(37.74) | 21.68 (29.27) / 26.62<br>(40.68)    |
| <b>Number of atoms</b>                      |                                     |                                  |                                     |
| All atoms                                   | 5,865                               | 1,712                            | 5,842                               |
| Protein                                     | 4,588                               | 1,678                            | 4,606                               |
| DNA                                         | 1,230                               | 0                                | 1,230                               |
| Ligands                                     | 28                                  | 10                               | 0                                   |
| Water                                       | 19                                  | 24                               | 6                                   |
| <b>Average B-factor<br/>(Å<sup>2</sup>)</b> |                                     |                                  |                                     |
| All atoms                                   | 99.03                               | 78.66                            | 151.78                              |
| Protein                                     | 99.91                               | 78.47                            | 130.49                              |
| DNA                                         | 125.61                              | n.d                              | 231.74                              |
| Ligands                                     | 119.31                              | 131.94                           | n.d.                                |
| Water                                       | 68.65                               | 69.38                            | 110.45                              |
| <b>R.m.s. deviations</b>                    |                                     |                                  |                                     |
| Bond lengths (Å)                            | 0.004                               | 0.002                            | 0.004                               |
| Bond angles (°)                             | 0.811                               | 0.518                            | 0.779                               |
| <b>Ramachandran<br/>statistics</b>          |                                     |                                  |                                     |
| Favored (%)                                 | 95.40                               | 95.96                            | 93.34                               |
| Allowed (%)                                 | 4.42                                | 3.54                             | 6.12                                |
| Outliers (%)                                | 0.18                                | 0.50                             | 0.54                                |

Data collection and refinement statistics.  $R_{\text{sym}} = \frac{\sum_h \sum_i |I_i(h) - \langle I(h) \rangle|}{\sum_h \sum_i I_i(h)}$ , where  $I_i(h)$  is the  $i^{\text{th}}$  measurement of  $h$  and  $\langle I(h) \rangle$  is the mean of all measurements of  $I(h)$  for reflection  $h$ .  $R_{\text{work}} = \frac{\sum ||F_o| - |F_c||}{\sum |F_o|}$ , calculated with a working set of reflections.  $R_{\text{free}}$  is  $R_{\text{work}}$  calculated with only the test set of reflections. Data for the highest resolution shell are given in parentheses. The structures were determined using single crystals.

**Table S3.** Primers used in this study

| <b>Name</b>              | <b>Sequence (5' - 3')</b>                                    |
|--------------------------|--------------------------------------------------------------|
| His-Sumo-RGG3St_Fwd      | AGAGAACAGATTGGTGGTATGAAGAGCAAACCTGGGT                        |
| His-Sumo-RGG3St_Rev      | GTCACCCGGGCTCGAGTTATTTGTTGTTAATCAGCTT                        |
| His-Sumo-Rgg3St-R10A_Fwd | CTGGGTAGCACCTGGCTAAAGTGCCTAACGG                              |
| His-Sumo-Rgg3St-R10A_Rev | CCGTTACGCACTTTAGCCAGGGTGCTACCCAG                             |
| His-Sumo-Rgg3St-R13A_Fwd | AGCACCTGCGTAAAGTGGCTAACGGCAAACAGATC                          |
| His-Sumo-Rgg3St-R13A_Rev | GATCTGTTTGCCGTTAGCCACTTTACGCAGGGTGCT                         |
| His-Sumo-Rgg3St-S31A_Fwd | CGAGCACCTGAGCAAGGCCCAAATCAGCCGTTTC                           |
| His-Sumo-Rgg3St-S31A_Rev | GAAACGGCTGATTTGGGCCTTGCTCAGGTGCTCG                           |
| His-Sumo-Rgg3St-R35A_Fwd | GCAAGAGCCAAATCAGCGCTTTCGAACGTGGTGAGA                         |
| His-Sumo-Rgg3St-R35A_Rev | TCTACCACGTTTCGAAAGCGCTGATTTGGCTCTTGC                         |
| His-Sumo-Rgg3St-C45S_Fwd | GTGAGAGCGAAATCAGCAGCATTTCGTCTGATCAAC                         |
| His-Sumo-Rgg3St-C45S_Rev | GTTGATCAGACGAATGCTGCTGATTTTCGCTCTCAC                         |
| pSHP2DNA_top             | CCATTTTTCCCACTTTCACAACAAAAAATT                               |
| pSHP2DNA_bot             | TTTTTTGTTGTGAAAGTGGGAAAAATGGAA                               |
| pSHP3DNA_top             | CATAATTTTTCCCATTTCCCAACAAAAAAG                               |
| pSHP3DNA_bot             | TTTTTGTTGGGGAAATGGGAAAATTATGCT                               |
| Rgg3M173I_S              | CCTACTTCCTATTGACAAAGGAGATATTAATAATTACAT<br>TACTCTTCAC        |
| Rgg3M173I_AS             | GTGAAGAGTAAATGTAATTATTTAATATCTCCTTTGTCAA<br>TAGGAAGTAGG      |
| Rgg2M167I_S              | AATTACAATACCCTATTTTTATTGACTAAGGAAATAGTAG<br>CATCTTTTGCTTATTC |
| Rgg2M167I_AS             | GAATAAGCAAAAAGATGCTACTATTTCTTAGTCAATAAAA<br>ATAGGGTATTGTAATT |
| Rgg3D60N_S               | ATTCTAGACAAATTACACACTTTGAATGAGTTCCTTA<br>TTTTACATGATGAAG     |
| Rgg3D60N_AS              | CTTCATCATGTAATAAAGGAACCTCATTCAAAGTAATGTG<br>TAATTTGTCTAGAAT  |
| Rgg3W146L_S              | AACTAACAGATTATCTCTTTAAAGTTGAAAAATTGGGCTA<br>CTATGAAATCC      |
| Rgg3W146L_AS             | GGATTTTCATAGTAGCCCAATTTTTCAACTTTAAAGAGATA<br>ATCTGTTAGTT     |

|                           |                                                                      |
|---------------------------|----------------------------------------------------------------------|
| Rgg3L169F_S               | CAATTAACTACAACCTCCTACTTCCTATTTCACAAAGGAGAT<br>GTAAATAATTA            |
| Rgg3L169F_AS              | TAATTATTTAACATCTCCTTTGTGAATAGGAAGTAGGAGT<br>TGAGTTAATTG              |
| Rgg3S180L_S               | C TTCCTATTGACAAAGGAGATGTTAAATAATTACATTTAC<br>TTATCACGGAACAAAATAATAAA |
| Rgg3S180L_AS              | TTTATTAGTTTTGTTCCGTGATAAGTAAATGTAATTATTT<br>AACATCTCCTTTGTCAATAGGAAG |
| Rgg3V190M_S               | TACTCTTCACGGAACAAAATAAAACGAATTATGACTC<br>AGCTTGCTATAAA               |
| Rgg3V190M_AS              | TTTATAGCAAGCTGAGTCATAATTCGTTTATTAGTTTTGT<br>TCCGTGAAGAGTA            |
| iPCR_pJC194_S             | GTGAAATCATTCTTTACC                                                   |
| iPCR_pJC194_AS            | ATTTTCCCCTTTCCAAC                                                    |
| Spn0960_S                 | TGTTGGGAAAGTGGGAAAATATGAAATCAAACCTTGGTG                              |
| Spn0960_AS                | AAGGTAAAGAATGATTTCACTTATTTTTGTTTACTGGTT<br>TATTAATG                  |
| Str1044R10A_S             | ACTTGGTAGCACCTGGCTAAAGTGCGTAACGGC                                    |
| Str1044R10A_AS            | GCCGTTACGCACTTTAGCCAGGGTGCTACCAAGT                                   |
| Str1044R13A_S             | AGCACCTGCGTAAAGTGGCTAACGGCAAACAGATC                                  |
| Str1044R13A_AS            | GATCTGTTTGCCGTTAGCCACTTTACGCAGGGTGCT                                 |
| Str1044S31A_S             | CGAGCACCTGAGCAAGGCCCAAATCAGCCGTTTC                                   |
| Str1044S31A_AS            | GAAACGGCTGATTTGGGCCTTGCTCAGGTGCTCG                                   |
| Str1044R35A_S             | GCAAGAGCCAAATCAGCGCTTTCGAACGTGGTGAGA                                 |
| Str1044R35A_AS            | TCTCACCACGTTTCGAAAGCGCTGATTTGGCTCTTGC                                |
| Spo0948_S                 | TGTTGGGAAAGTGGGAAAATATGTTATCTAACCTTGGTA<br>AAAC                      |
| Spo0948_AS                | AAGGTAAAGAATGATTTACAAAATTTTAAACATGTTTTT<br>GTAGTG                    |
| LT-1_579700-<br>580780_S  | AAGGAAAGTTTATCCACCAACGATAATCA                                        |
| LT-1_579700-<br>580780_AS | CCTTTTCCTTCTCACTGTTATTGTACGA                                         |
| Str1044_S                 | TGTTGGGAAAGTGGGAAAATATGAAATCAAACCTTGGTA<br>G                         |
| Str1044_AS                | AAGGTAAAGAATGATTTCACTTATTTGTTGTTTATCAGTT<br>ATC                      |

## SI References

1. V. Parashar, C. Aggarwal, M. J. Federle, M. B. Neiditch, Rgg protein structure-function and inhibition by cyclic peptide compounds. *Proc Natl Acad Sci U S A* **112**, 5177-5182 (2015).
2. A. Punjani, J. L. Rubinstein, D. J. Fleet, M. A. Brubaker, cryoSPARC: algorithms for rapid unsupervised cryo-EM structure determination. *Nat Methods* **14**, 290-296 (2017).
3. A. Punjani, H. Zhang, D. J. Fleet, Non-uniform refinement: Adaptive regularization improves single particle cryo-EM reconstruction. *bioRxiv* 10.1101/2019.12.15.877092, 2019.2012.2015.877092 (2019).
4. T. C. Terwilliger, O. V. Sobolev, P. V. Afonine, P. D. Adams, Automated map sharpening by maximization of detail and connectivity. *Acta Crystallogr D Struct Biol* **74**, 545-559 (2018).
5. P. Emsley, K. Cowtan, Coot: model-building tools for molecular graphics. *Acta crystallographica. Section D, Biological crystallography* **60**, 2126-2132 (2004).
6. P. D. Adams *et al.*, PHENIX: a comprehensive Python-based system for macromolecular structure solution. *Acta crystallographica. Section D, Biological crystallography* **66**, 213-221 (2010).
7. P. D. Adams *et al.*, PHENIX: building new software for automated crystallographic structure determination. *Acta crystallographica. Section D, Biological crystallography* **58**, 1948-1954 (2002).
8. P. V. Afonine *et al.*, Real-space refinement in PHENIX for cryo-EM and crystallography. *Acta Crystallogr D Struct Biol* **74**, 531-544 (2018).
9. B. A. Barad *et al.*, EMRinger: side chain-directed model and map validation for 3D cryo-electron microscopy. *Nat Methods* **12**, 943-946 (2015).
10. Y. Z. Tan *et al.*, Addressing preferred specimen orientation in single-particle cryo-EM through tilting. *Nat Methods* **14**, 793-796 (2017).
11. E. F. Pettersen *et al.*, UCSF Chimera--a visualization system for exploratory research and analysis. *Journal of computational chemistry* **25**, 1605-1612 (2004).
12. T. D. Goddard *et al.*, UCSF ChimeraX: Meeting modern challenges in visualization and analysis. *Protein Sci* **27**, 14-25 (2018).
13. Z. Otwinowski, W. Minor, [20] Processing of X-ray diffraction data collected in oscillation mode. *Methods in enzymology* **276**, 307-326 (1997).
14. A. J. McCoy *et al.*, Phaser crystallographic software. *Journal of applied crystallography* **40**, 658-674 (2007).
15. J. Painter, E. A. Merritt, Optimal description of a protein structure in terms of multiple groups undergoing TLS motion. *Acta crystallographica. Section D, Biological crystallography* **62**, 439-450 (2006).
16. S. C. Lovell *et al.*, Structure validation by Calpha geometry: phi,psi and Cbeta deviation. *Proteins* **50**, 437-450 (2003).
17. P. Gouet, E. Courcelle, D. I. Stuart, F. Metz, ESPrpt: analysis of multiple sequence alignments in PostScript. *Bioinformatics* **15**, 305-308 (1999).



18. F. Madeira *et al.*, The EMBL-EBI search and sequence analysis tools APIs in 2019. *Nucleic Acids Res* **47**, W636-W641 (2019).
19. B. Lasarre, C. Aggarwal, M. J. Federle, Antagonistic Rgg regulators mediate quorum sensing via competitive DNA binding in *Streptococcus pyogenes*. *MBio* **3** (2013).
20. J. Schindelin *et al.*, Fiji: an open-source platform for biological-image analysis. *Nat Methods* **9**, 676-682 (2012).
21. G. Cardone, J. B. Heymann, A. C. Steven, One number does not fit all: mapping local variations in resolution in cryo-EM reconstructions. *J Struct Biol* **184**, 226-236 (2013).
22. N. M. Luscombe, R. A. Laskowski, J. M. Thornton, NUCPLOT: a program to generate schematic diagrams of protein-nucleic acid interactions. *Nucleic Acids Res* **25**, 4940-4945 (1997).
